# Supplementary material
Source: PubMed Central journal article supplement (PMC5526658)
Supplement: NIHMS879353-supplement-Supplemental_table_1.pdf [file NIHMS879353-supplement-Supplemental_table_1.pdf]

Table 1: Primer sequences

|            |                                  |                                  |
|------------|----------------------------------|----------------------------------|
| Actin:     | F-5'- GTGGGCATGGGTCAGAAG-3'      | R-5'- TCCATCACGATGCCAGTG-3'      |
| Nestin:    | F-5'- AGACACCTGTGCCAGCCTTTC-3'   | R-5'- CTGCTGCAAGCTGCTTACCAC-3'   |
| CD133:     | F-5'- GAACAAGTTTACAGTGACTGC-3'   | R-5'- TCGTTGAAGTATCTTTGACG-3'    |
| PPP1R15A:  | F-5'- ATGATGGCATGTATGGTGAGC-3'   | R- AACCTTGCAGTGCCTTATCAG-3'      |
| UHRF1:     | F-5'- GCCATACCCTCTTCGACTACG-3'   | R-5'- GCCCCAATTCCGTCTCATCC-3'    |
| TNFRSF11A: | F-5'- AGATCGCTCCTCCATGTACCA-3'   | R-5'- GCCTTGCCTGTATCACAACTTT-3'  |
| PTCHD2:    | F-5'- GAAGCAACGGGTGAAACCTTT-3'   | R-5'- CACAGCACGGATTGGTGAAG-3'    |
| PDGFA:     | F-5'- GCAAGACCAGGACGGTCATTT-3'   | R-5'- GGCACCTGACACTGCTCGT-3'     |
| HERPUD1:   | F-5'- ATGGAGTCCGAGACCGAAC-3'     | R-5'- TTGGTGATCCAACAACAGCTT-3'   |
| DDIT3:     | F-5'- GGAAACAGAGTGGTCATTCCC-3'   | R-5'- CTGCTTGAGCCGTTTATTCTC-3'   |
| FOSB:      | F-5'- GCTGCAAGATCCCCTACGAAG-3'   | R-5'- ACGAAGAAGTGTACGAAGGGTT-3'  |
| EIF2AK3:   | F-5'- ACGATGAGACAGAGTTGCGAC-3'   | R-5'- ATCCAAGGCAGCAATTCTCCC-3'   |
| ATF3:      | F-5'- CCTCTGCGCTGGAATCAGTC-3'    | R-5'- TTCTTTCTCGTCGCCTCTTTTT-3'  |
| POU3F1:    | F-5'- CGCTCTACGGTAACGTGTTCT-3'   | R-5'- CCAAGCCGGTGATCTCGTG-3'     |
| ATF4:      | F-5'- CTCCGGGACAGATTGGATGTT-3'   | R-5'- GGCTGCTTATTAGTCTCCTGGAC-3' |
| PIK3R3:    | F-5'- TACAATACGGTGTGGAGTATGGA-3' | R-5'- TCATTGGCTTAGGTGGCTTTG-3'   |
