# Supplementary material
Source: PubMed Central journal article supplement (PMC5526658)
Supplement: NIHMS879353-supplement-Supplemetal_table_2.pdf [file NIHMS879353-supplement-Supplemetal_table_2.pdf]

Table 2: Genes altered by KDM1A inhibitor treatment

| Gene ID      | Control   | NCD-38    | fold change | p-value   |
|--------------|-----------|-----------|-------------|-----------|
| IL32         | 0         | 60.54473  | Inf         | 4.26E-20  |
| LTA          | 0         | 9.0410419 | Inf         | 0.00175   |
| NFATC2       | 0.5114785 | 180.5751  | 353.0453633 | 1.07E-38  |
| MTUS2        | 0.5114785 | 40.086613 | 78.37399979 | 2.01E-12  |
| COL20A1      | 1.0229569 | 49.33705  | 48.22984135 | 2.36E-14  |
| SLC8A2       | 0.5114785 | 22.358944 | 43.71434168 | 6.71E-07  |
| FOSB         | 8.0526781 | 346.81335 | 43.06807601 | 9.83E-83  |
| GABRR2       | 0.9855348 | 37.799183 | 38.35397924 | 8.57E-11  |
| BHMT         | 0.9855348 | 33.687416 | 34.1818619  | 1.38E-09  |
| BIRC3        | 16.011801 | 488.40523 | 30.50282924 | 3.81E-103 |
| KLHDC7B      | 1.4783023 | 45.06019  | 30.48103934 | 3.14E-12  |
| TNFRSF9      | 1.4970133 | 41.999554 | 28.05556475 | 2.97E-11  |
| EHF          | 1.4970133 | 40.441028 | 27.01447458 | 8.24E-11  |
| CXCL2        | 0.4927674 | 12.323187 | 25.00812047 | 0.000726  |
| LOC100128071 | 0.4927674 | 11.980886 | 24.31347008 | 0.000984  |
| LOC100130348 | 0.4927674 | 10.466662 | 21.24057223 | 0.002738  |
| PRDM16       | 11.046705 | 212.74414 | 19.25860631 | 8.38E-23  |
| HERPUD1      | 1180.6314 | 21119.093 | 17.88796517 | 0         |
| CHST1        | 1.4970133 | 24.956487 | 16.67085202 | 2.29E-06  |
| ADM2         | 11.483339 | 191.31553 | 16.66027034 | 3.03E-39  |
| CDRT1        | 1.5344354 | 25.298788 | 16.48735986 | 1.70E-06  |
| HRK          | 2.5199702 | 40.992725 | 16.26714631 | 7.85E-10  |
| FOLR3        | 1.0042459 | 16.213445 | 16.14489531 | 0.000179  |
| PTGS2        | 6.4621096 | 102.49998 | 15.86169042 | 5.82E-22  |
| SYT4         | 42.802072 | 641.82502 | 14.99518577 | 1.43E-62  |
| BEX5         | 10.479093 | 152.66665 | 14.56868947 | 1.34E-30  |
| EDIL3        | 12.562429 | 182.93902 | 14.56239219 | 4.80E-36  |
| C9orf150     | 12.562429 | 173.25768 | 13.79173374 | 1.21E-33  |
| CA3          | 3.0314487 | 41.169932 | 13.58094302 | 2.47E-09  |
| LOC344887    | 6.0441864 | 80.882056 | 13.38179388 | 1.77E-16  |
| PLAC2        | 5.0399405 | 66.126419 | 13.12047628 | 5.47E-14  |
| YPEL4        | 10.971861 | 143.3598  | 13.06613404 | 7.26E-28  |
| DMGDH        | 18.587904 | 242.31183 | 13.03599488 | 2.56E-44  |
| FAM71F2      | 1.4970133 | 18.988195 | 12.68405242 | 0.000103  |
| NR4A3        | 7.996545  | 99.68093  | 12.46549974 | 8.41E-20  |
| AKR1B10      | 16.52328  | 203.25212 | 12.30095496 | 3.70E-37  |
| IRF1         | 124.9257  | 1515.8534 | 12.13403967 | 2.24E-169 |
| C11orf75     | 1.4970133 | 17.518273 | 11.70214928 | 0.000259  |
| ACRBP        | 3.5429272 | 41.169932 | 11.62031568 | 7.23E-09  |
| ATF3         | 637.98936 | 7362.0932 | 11.53952333 | 0.00E+00  |
| FGF19        | 2.0459139 | 23.397962 | 11.43643536 | 1.78E-05  |
| SPTBN5       | 11.084127 | 125.94225 | 11.36239666 | 1.55E-23  |
| F2RL2        | 14.02202  | 152.69884 | 10.88993159 | 1.85E-27  |
| KCNQ3        | 36.589486 | 391.75275 | 10.70670273 | 6.56E-61  |
| TRIM78P      | 2.0272028 | 21.497135 | 10.60433345 | 5.91E-05  |
| CCL2         | 14.608343 | 152.67877 | 10.45147754 | 9.06E-20  |

|              |           |           |             |           |
|--------------|-----------|-----------|-------------|-----------|
| C9orf24      | 2.0084918 | 20.933324 | 10.42240968 | 8.11E-05  |
| PAPPA2       | 1.9897807 | 20.623211 | 10.36456459 | 8.63E-05  |
| KCNK6        | 2.4825482 | 25.254487 | 10.17280833 | 1.45E-05  |
| INHBE        | 9.4748473 | 95.758484 | 10.10659923 | 1.93E-17  |
| C7orf57      | 2.5199702 | 24.082564 | 9.556685767 | 2.67E-05  |
| DNAJB9       | 692.96093 | 6523.6931 | 9.414229319 | 2.82E-263 |
| RELB         | 84.961688 | 788.90168 | 9.285381384 | 1.78E-89  |
| SLC9A5       | 9.038213  | 83.556089 | 9.244757683 | 6.06E-15  |
| BEX2         | 18.132559 | 165.89595 | 9.149064525 | 2.65E-27  |
| LRRC2        | 1.9897807 | 18.126386 | 9.109740231 | 0.002668  |
| NR4A2        | 19.04325  | 170.89376 | 8.973980795 | 1.36E-12  |
| BMF          | 7.5411997 | 66.513022 | 8.819952436 | 5.32E-12  |
| ALDH8A1      | 2.5012592 | 21.529323 | 8.607393641 | 0.002357  |
| LEFTY1       | 2.5199702 | 21.662228 | 8.596223813 | 0.000113  |
| CIITA        | 5.0773626 | 43.159363 | 8.500350785 | 3.59E-08  |
| CMYA5        | 10.005037 | 84.562918 | 8.45203471  | 1.62E-08  |
| HSD17B3      | 1.9897807 | 16.479256 | 8.281945703 | 0.001139  |
| RASD1        | 10.042459 | 82.372052 | 8.202378833 | 2.22E-12  |
| SLC38A1      | 123.02948 | 995.62942 | 8.09260872  | 1.05E-104 |
| CHAC1        | 61.258999 | 493.90628 | 8.062591399 | 2.13E-63  |
| LAMP3        | 3.5055051 | 28.238633 | 8.055510382 | 1.40E-05  |
| TNFAIP3      | 106.15069 | 852.8092  | 8.033948889 | 5.77E-94  |
| REPS2        | 2.4638371 | 19.672797 | 7.984617702 | 0.000356  |
| CLDN1        | 10.535226 | 83.157372 | 7.893268702 | 7.69E-14  |
| TMEM88       | 3.486794  | 27.421125 | 7.864280033 | 2.38E-05  |
| C3orf35      | 2.5573923 | 20.071514 | 7.848429937 | 0.000566  |
| JMY          | 331.84406 | 2597.3305 | 7.82696106  | 4.05E-171 |
| CORIN        | 6.5369538 | 50.641879 | 7.747014964 | 6.47E-09  |
| AQPEP        | 8.0152561 | 61.672351 | 7.694370698 | 1.76E-10  |
| HSPA6        | 12.543718 | 94.739541 | 7.55274796  | 2.12E-13  |
| SERPINB8     | 81.156806 | 611.47201 | 7.534451368 | 2.99E-71  |
| LZTFL1       | 443.86425 | 3316.0587 | 7.470884893 | 6.31E-150 |
| PI15         | 6.5182427 | 48.000034 | 7.363953095 | 2.54E-08  |
| PPP1R15A     | 1356.4681 | 9897.4166 | 7.296461092 | 8.57E-237 |
| SCN3B        | 32.666058 | 231.63577 | 7.091023054 | 1.33E-31  |
| CCDC154      | 18.606615 | 131.85412 | 7.086410862 | 1.64E-19  |
| ADAM32       | 5.0212294 | 34.770735 | 6.924745347 | 3.73E-06  |
| WDR96        | 4.509751  | 31.222779 | 6.923393073 | 1.20E-05  |
| MATN1        | 6.5182427 | 44.407775 | 6.812844683 | 1.64E-07  |
| HGD          | 2.9940266 | 20.192306 | 6.744197243 | 0.000554  |
| ARHGAP9      | 3.0127377 | 19.805703 | 6.573988627 | 0.000711  |
| SERPINF2     | 3.486794  | 22.789849 | 6.536046826 | 0.000282  |
| AGPAT9       | 164.35953 | 1062.1667 | 6.462458776 | 2.68E-93  |
| LOC100129196 | 9.0943461 | 58.422394 | 6.424034599 | 3.61E-09  |
| HSPA5        | 20452.947 | 131279.16 | 6.41859373  | 8.14E-249 |
| C16orf71     | 18.587904 | 119.23294 | 6.41454426  | 8.70E-17  |
| MFSD2A       | 248.76603 | 1583.683  | 6.366154649 | 1.69E-74  |

|              |           |           |             |           |
|--------------|-----------|-----------|-------------|-----------|
| GPR35        | 7.5037776 | 47.689921 | 6.355454979 | 1.63E-05  |
| OSGIN1       | 234.85628 | 1454.7124 | 6.194053447 | 5.08E-50  |
| ARHGAP27     | 56.275192 | 344.38886 | 6.119727961 | 3.35E-39  |
| MXD1         | 228.11979 | 1395.7185 | 6.118358095 | 1.18E-88  |
| SRXN1        | 1674.0469 | 10142.459 | 6.058646665 | 4.97E-202 |
| TSSK3        | 36.570775 | 220.04149 | 6.016866892 | 3.77E-27  |
| VCAM1        | 66.149251 | 394.68048 | 5.966514733 | 1.70E-43  |
| NUPR1        | 76.247843 | 453.54174 | 5.948256655 | 1.28E-48  |
| ABLIM3       | 3.0501597 | 17.949178 | 5.884668217 | 0.002004  |
| FAM189A2     | 17.109602 | 100.54274 | 5.876392603 | 9.14E-14  |
| KLF4         | 110.75399 | 649.17048 | 5.861373084 | 1.69E-62  |
| ULBP1        | 23.135077 | 132.63944 | 5.733261191 | 4.14E-17  |
| C7orf63      | 17.908027 | 102.49998 | 5.723689414 | 1.45E-13  |
| EIF2AK3      | 1157.6087 | 6604.2689 | 5.705096148 | 1.54E-176 |
| C17orf91     | 224.42717 | 1275.6923 | 5.684215153 | 1.09E-38  |
| BAIAP2L2     | 5.5327079 | 31.432174 | 5.68115553  | 0.000203  |
| YPEL2        | 32.51637  | 182.46381 | 5.611444797 | 5.22E-22  |
| MSTO2P       | 52.202075 | 292.75642 | 5.608137682 | 1.15E-32  |
| SERINC4      | 18.076426 | 101.15085 | 5.595732924 | 2.36E-13  |
| CELF6        | 19.118094 | 106.85333 | 5.589120604 | 4.84E-14  |
| STXBP2       | 4.4723289 | 24.823582 | 5.550482158 | 0.000349  |
| ZC3H12B      | 3.486794  | 19.330496 | 5.543916887 | 0.001732  |
| MIR635       | 14.570921 | 80.362547 | 5.515268946 | 8.59E-11  |
| COL11A2      | 28.57423  | 157.318   | 5.505590281 | 2.77E-19  |
| EIF4E3       | 12.999063 | 71.099996 | 5.469624535 | 1.10E-09  |
| TCP11L2      | 55.233524 | 301.77324 | 5.463588372 | 5.89E-33  |
| RFPL3-AS1    | 5.9319201 | 32.394702 | 5.461081881 | 4.78E-05  |
| HYOU1        | 8319.5038 | 45307.055 | 5.445884214 | 4.16E-206 |
| C3orf20      | 4.0169835 | 21.839436 | 5.43677499  | 0.000872  |
| SLFN5        | 41.043104 | 222.4819  | 5.420688832 | 6.53E-22  |
| SPEF1        | 4.528462  | 24.304073 | 5.366959698 | 0.000446  |
| ADAM8        | 7.996545  | 42.861364 | 5.359985278 | 2.82E-06  |
| RPS27        | 20.521552 | 109.76099 | 5.348571526 | 8.22E-14  |
| C17orf28     | 44.548609 | 237.37044 | 5.32834678  | 1.60E-26  |
| GPR126       | 10.005037 | 52.675611 | 5.264909311 | 2.30E-07  |
| TRIB3        | 1481.8115 | 7795.3931 | 5.26071861  | 3.04E-127 |
| LOC339666    | 16.579413 | 87.192649 | 5.259091563 | 3.26E-11  |
| CNTD2        | 3.9795615 | 20.889022 | 5.24907641  | 0.001435  |
| GSDMB        | 41.136659 | 215.59953 | 5.241055937 | 4.48E-24  |
| MBNL2        | 332.19957 | 1735.1096 | 5.223094082 | 7.22E-103 |
| RSAD2        | 32.591214 | 169.08949 | 5.18819262  | 1.45E-19  |
| DDIT3        | 1295.1155 | 6710.2241 | 5.181177967 | 4.22E-161 |
| SYVN1        | 1270.2088 | 6539.4708 | 5.148343202 | 1.04E-159 |
| LOC100131094 | 5.5139969 | 28.282934 | 5.129298259 | 0.000193  |
| FBXO32       | 182.1303  | 931.64956 | 5.115291539 | 4.35E-71  |
| PLA2G4C      | 72.835893 | 372.52678 | 5.114604382 | 6.58E-18  |
| CLDN15       | 128.71187 | 656.24216 | 5.098536344 | 1.90E-56  |

|           |           |           |             |           |
|-----------|-----------|-----------|-------------|-----------|
| KCNG1     | 18.606615 | 94.695239 | 5.089331766 | 1.41E-09  |
| TG        | 7.0671433 | 35.809752 | 5.067076035 | 2.67E-05  |
| FAM83G    | 4.0169835 | 20.28091  | 5.048790867 | 0.001852  |
| MUC20     | 11.539472 | 58.124395 | 5.037006364 | 9.05E-08  |
| OAS2      | 6.9735881 | 35.068734 | 5.028793486 | 3.52E-05  |
| SNORD19B  | 5.4952858 | 27.421125 | 4.989936045 | 0.000308  |
| KIAA1875  | 10.535226 | 52.156103 | 4.950639055 | 5.01E-07  |
| LOC652276 | 27.170772 | 134.18585 | 4.938610261 | 1.46E-15  |
| CP        | 7.5224886 | 37.146769 | 4.938095707 | 2.30E-05  |
| MAFF      | 311.69673 | 1534.3865 | 4.922690425 | 1.55E-91  |
| FRY       | 184.89351 | 909.71737 | 4.920223375 | 6.86E-68  |
| ISG20     | 20.103629 | 98.641913 | 4.90667201  | 6.59E-12  |
| SPATA17   | 52.732265 | 257.75207 | 4.887938492 | 1.70E-26  |
| TFAP2E    | 9.0943461 | 44.452077 | 4.887880538 | 3.40E-06  |
| NFKB2     | 282.19309 | 1377.5316 | 4.881521221 | 7.97E-86  |
| HSP90B1   | 24463.656 | 119245.79 | 4.874405897 | 6.88E-175 |
| CNKSRI    | 5.5139969 | 26.724409 | 4.846649233 | 0.0004    |
| TRAF1     | 9.5309804 | 46.131395 | 4.840152099 | 0.000764  |
| RNU86     | 5.0212294 | 24.171167 | 4.813794664 | 0.000785  |
| EGR1      | 290.93193 | 1376.8871 | 4.732677919 | 2.63E-83  |
| KDM6B     | 395.53562 | 1871.6954 | 4.732052583 | 7.60E-67  |
| DNAH17    | 20.596396 | 97.3935   | 4.728667045 | 2.06E-11  |
| C6orf27   | 4.4910399 | 21.231323 | 4.727484866 | 0.001954  |
| CDK2AP2   | 605.29204 | 2856.1289 | 4.718596475 | 1.29E-36  |
| NOD2      | 5.5514189 | 26.160598 | 4.712416491 | 0.000509  |
| LAT       | 38.785088 | 182.62891 | 4.708740238 | 2.22E-19  |
| CA13      | 71.15177  | 334.66737 | 4.703570636 | 8.95E-29  |
| DNAJA4    | 5.588841  | 26.071994 | 4.665009133 | 0.000719  |
| AMIGO3    | 197.68047 | 920.24841 | 4.65523175  | 4.42E-65  |
| HSP90B3P  | 1620.9714 | 7497.1166 | 4.625076391 | 9.88E-146 |
| PNRC1     | 355.24109 | 1640.9539 | 4.619268394 | 7.24E-89  |
| SCN9A     | 12.107084 | 55.48255  | 4.582651855 | 4.79E-07  |
| OASL      | 7.5037776 | 34.33983  | 4.576339036 | 9.12E-05  |
| C5AR1     | 16.579413 | 75.807762 | 4.572403328 | 4.72E-09  |
| FOXP2     | 81.593441 | 373.01825 | 4.571669617 | 2.03E-33  |
| LRRN4CL   | 63.984791 | 292.42208 | 4.570181127 | 7.31E-28  |
| NFIL3     | 79.95917  | 365.30211 | 4.56860815  | 4.23E-33  |
| GOLGA7B   | 35.603951 | 162.0057  | 4.550216735 | 6.20E-17  |
| SPSB3     | 264.71542 | 1191.7251 | 4.501910177 | 1.59E-51  |
| ITIH4     | 18.569193 | 83.423183 | 4.492558267 | 1.25E-09  |
| SOD2      | 1304.7899 | 5858.3172 | 4.48985471  | 4.22E-134 |
| SLC7A11   | 2318.1551 | 10332.982 | 4.457416156 | 3.97E-82  |
| VWCE      | 8.5267345 | 37.875673 | 4.441990399 | 6.05E-05  |
| TSPYL2    | 692.89852 | 3067.13   | 4.426521219 | 3.25E-110 |
| USP36     | 924.17445 | 4072.5854 | 4.406728003 | 3.95E-120 |
| WARS      | 2423.551  | 10659.102 | 4.398134185 | 1.87E-145 |
| GDF15     | 238.81085 | 1042.3485 | 4.364745158 | 7.11E-16  |

|            |           |           |             |           |
|------------|-----------|-----------|-------------|-----------|
| ABCC2      | 6.0628974 | 26.426409 | 4.358709656 | 0.000812  |
| ASNS       | 1832.4058 | 7962.9213 | 4.345610192 | 5.90E-137 |
| RRP12      | 536.87234 | 2331.3546 | 4.342474748 | 1.01E-97  |
| CEBPB      | 296.85757 | 1285.8205 | 4.331439092 | 2.56E-73  |
| SERP1      | 1737.7759 | 7519.8618 | 4.327290951 | 4.22E-135 |
| HDAC9      | 827.84797 | 3581.9738 | 4.326849722 | 5.86E-113 |
| FLJ42627   | 19.498595 | 84.240691 | 4.3203467   | 2.13E-09  |
| C4orf34    | 515.3154  | 2204.0473 | 4.277084056 | 1.08E-93  |
| ATF4       | 3586.6237 | 15276.014 | 4.259162791 | 7.31E-146 |
| ARF4       | 7244.8299 | 30706.913 | 4.238458779 | 6.10E-152 |
| AVIL       | 46.762922 | 197.70677 | 4.227853181 | 3.11E-10  |
| FKBP11     | 210.24918 | 887.13691 | 4.219454797 | 1.89E-57  |
| GABARAPL1  | 106.31909 | 447.19896 | 4.206196401 | 1.12E-35  |
| DNHD1      | 155.22776 | 652.60976 | 4.204207814 | 1.57E-46  |
| SEL1L      | 6330.2426 | 26575.735 | 4.198217447 | 4.81E-149 |
| NLRC4      | 8.5267345 | 35.721149 | 4.189311693 | 0.000121  |
| ICAM1      | 553.91338 | 2318.2661 | 4.185250323 | 1.58E-93  |
| KCND1      | 31.112911 | 130.0862  | 4.181100212 | 4.03E-13  |
| STX3       | 69.692178 | 290.71058 | 4.171351569 | 2.86E-25  |
| NCRNA00219 | 78.424734 | 326.37946 | 4.161690405 | 1.08E-11  |
| OTUD1      | 49.700816 | 206.63498 | 4.157577227 | 3.80E-19  |
| PLAG1      | 6.0067643 | 24.956487 | 4.1547306   | 0.001606  |
| WIPI1      | 845.15096 | 3467.1665 | 4.102422717 | 3.47E-105 |
| VWA5B2     | 21.182719 | 86.528121 | 4.084844901 | 2.88E-09  |
| MAP1LC3B   | 3040.0022 | 12373.167 | 4.070117683 | 2.33E-134 |
| ACCN3      | 55.233524 | 224.34258 | 4.061710347 | 1.41E-16  |
| TCP10L     | 10.042459 | 40.694725 | 4.052267067 | 5.30E-05  |
| TTC25      | 47.106002 | 190.77595 | 4.049928769 | 2.17E-17  |
| TLR3       | 14.55221  | 58.865413 | 4.045118472 | 1.29E-06  |
| WDR66      | 18.569193 | 75.066744 | 4.042541967 | 3.76E-08  |
| TMEM39A    | 467.33613 | 1887.011  | 4.037802537 | 4.07E-82  |
| SLC22A20   | 5.5514189 | 22.403246 | 4.035589178 | 0.00313   |
| PILRA      | 10.479093 | 42.253251 | 4.032147676 | 4.32E-05  |
| KLF5       | 37.705998 | 151.50685 | 4.018109905 | 2.61E-14  |
| UNC13D     | 37.649865 | 150.45571 | 3.996182014 | 3.32E-14  |
| C5orf41    | 202.27135 | 806.91143 | 3.989252256 | 7.86E-51  |
| KCNJ14     | 28.062752 | 111.92763 | 3.98847655  | 4.69E-11  |
| KIAA0415   | 1275.7849 | 5071.5482 | 3.975237534 | 2.40E-17  |
| TNFRSF10B  | 2099.9718 | 8333.1118 | 3.968201718 | 1.37E-123 |
| RAB39B     | 424.32823 | 1679.7641 | 3.958643257 | 8.77E-76  |
| SLC5A12    | 5.9880532 | 23.607357 | 3.942409329 | 0.002591  |
| LOC729513  | 31.112911 | 122.64799 | 3.942028592 | 7.68E-12  |
| CYP27B1    | 90.325997 | 355.67719 | 3.937705659 | 6.30E-28  |
| COLQ       | 22.623599 | 88.871967 | 3.928285975 | 4.49E-09  |
| MAP1LC3B2  | 320.75993 | 1257.4853 | 3.92033159  | 1.23E-64  |
| LYSMD3     | 537.15313 | 2102.651  | 3.914435011 | 6.67E-62  |
| NEBL       | 1336.9321 | 5232.8627 | 3.914082734 | 7.20E-111 |

|             |           |           |             |           |
|-------------|-----------|-----------|-------------|-----------|
| GCLM        | 609.74578 | 2373.5722 | 3.892724213 | 1.81E-31  |
| SYNE1       | 1036.4629 | 4022.3911 | 3.880882907 | 1.34E-102 |
| ZNF222      | 128.86784 | 498.46522 | 3.868034204 | 3.79E-17  |
| ZFP36       | 213.90437 | 827.04316 | 3.866415383 | 3.84E-50  |
| CD24        | 328.78762 | 1267.8149 | 3.856029925 | 5.79E-64  |
| LOC202181   | 20.764796 | 80.008132 | 3.853066223 | 3.09E-08  |
| PDXDC2P     | 162.91865 | 626.43704 | 3.845091134 | 3.22E-41  |
| ZNF841      | 381.62587 | 1457.3788 | 3.818867887 | 5.61E-68  |
| ARTN        | 10.479093 | 39.953707 | 3.812706563 | 0.000103  |
| SPAG4       | 9.0007909 | 34.251227 | 3.805357431 | 0.000358  |
| PIM1        | 106.5062  | 404.69201 | 3.799703889 | 7.57E-30  |
| SEC24A      | 1450.9606 | 5500.9728 | 3.791262619 | 9.41E-108 |
| FOXO4       | 33.689015 | 127.65375 | 3.789180297 | 7.17E-12  |
| JAKMIP3     | 22.586177 | 85.412614 | 3.781632199 | 1.81E-08  |
| CCDC65      | 25.124858 | 94.928863 | 3.778284508 | 3.20E-09  |
| EPB41       | 508.06114 | 1917.0781 | 3.773321672 | 4.49E-76  |
| FBXL19-AS1  | 159.54412 | 600.87244 | 3.766183601 | 3.36E-39  |
| ADAMTS9-AS2 | 7.9591229 | 29.974366 | 3.766038822 | 0.001028  |
| BMS1P4      | 24.538536 | 92.03332  | 3.750562862 | 6.91E-09  |
| TAF1D       | 324.64594 | 1213.5607 | 3.738105247 | 5.23E-60  |
| C11orf42    | 7.0297212 | 26.249202 | 3.734031711 | 0.002016  |
| CEP95       | 567.46762 | 2117.3018 | 3.731141161 | 3.04E-78  |
| KCNH8       | 28.649074 | 106.86545 | 3.730153562 | 4.90E-10  |
| BACH2       | 71.719381 | 267.47771 | 3.729503869 | 3.63E-21  |
| OVGP1       | 8.5267345 | 31.56508  | 3.70189545  | 0.000688  |
| SEC24D      | 2287.3979 | 8443.924  | 3.691497686 | 1.55E-112 |
| TNXB        | 21.619353 | 79.577228 | 3.680832958 | 8.49E-08  |
| TRIM16L     | 276.76022 | 1018.2542 | 3.679192639 | 2.20E-53  |
| ALDH1L2     | 1411.2338 | 5176.345  | 3.667956962 | 1.13E-101 |
| N4BP2L1     | 36.11543  | 132.29714 | 3.663175029 | 1.05E-11  |
| ISL2        | 32.778324 | 119.39803 | 3.642591023 | 7.96E-11  |
| MIAT        | 271.30236 | 986.81404 | 3.637322004 | 3.98E-40  |
| SESN2       | 790.09827 | 2865.9756 | 3.627366059 | 4.67E-85  |
| ACAP1       | 9.5684025 | 34.682131 | 3.624652229 | 0.000437  |
| SLC38A2     | 2786.0153 | 10081.858 | 3.618737506 | 3.68E-112 |
| PLCB4       | 58.626763 | 211.39916 | 3.605847434 | 7.77E-17  |
| EDA2R       | 405.22885 | 1460.3788 | 3.603837269 | 2.22E-63  |
| DNASE1L2    | 22.436489 | 80.82564  | 3.602419325 | 1.06E-07  |
| SQSTM1      | 8795.4287 | 31575.307 | 3.589967957 | 2.59E-122 |
| ARFGAP1     | 1463.3921 | 5243.6669 | 3.583227575 | 1.07E-81  |
| TACR2       | 7.5224886 | 26.901616 | 3.5761591   | 0.002414  |
| SPSB1       | 103.53088 | 369.62328 | 3.570174151 | 5.15E-26  |
| LTB4R2      | 15.575167 | 55.603342 | 3.569999754 | 0.000115  |
| ANXA1       | 497.99369 | 1776.0179 | 3.566346102 | 1.52E-68  |
| C14orf28    | 74.619853 | 265.68556 | 3.56052111  | 4.43E-20  |
| DYRK3       | 80.776305 | 286.9733  | 3.552691583 | 2.85E-21  |
| SPTY2D1     | 890.39188 | 3158.1523 | 3.546924009 | 4.39E-85  |

|            |           |           |             |           |
|------------|-----------|-----------|-------------|-----------|
| ELMO3      | 35.75364  | 126.79194 | 3.546266688 | 4.70E-11  |
| HSD17B7P2  | 34.768105 | 123.17961 | 3.542891096 | 3.31E-10  |
| DNAJC25    | 275.39419 | 975.17545 | 3.541016849 | 2.03E-46  |
| SDF2L1     | 338.40587 | 1189.3732 | 3.514635357 | 1.90E-55  |
| CRELD2     | 1132.8516 | 3980.1655 | 3.513404011 | 3.37E-90  |
| KIAA1683   | 19.59215  | 68.723963 | 3.507729443 | 1.30E-06  |
| SGTB       | 674.39174 | 2364.8572 | 3.506652028 | 3.18E-73  |
| NCRNA00176 | 29.541054 | 103.40609 | 3.500419923 | 3.91E-09  |
| CEBPG      | 2346.9915 | 8194.7062 | 3.491579059 | 1.93E-103 |
| SEL1L3     | 110.92239 | 386.56563 | 3.485009796 | 3.57E-26  |
| SELK       | 1011.6063 | 3515.7909 | 3.475453915 | 2.17E-85  |
| RAD9A      | 314.48493 | 1091.5488 | 3.47090983  | 7.00E-52  |
| LOC388152  | 7.977834  | 27.63052  | 3.463411285 | 0.002416  |
| ZNF547     | 73.066706 | 252.77849 | 3.45955774  | 1.44E-18  |
| IFT20      | 152.05905 | 525.15329 | 3.453614095 | 3.07E-32  |
| DOK3       | 18.076426 | 62.401255 | 3.452079272 | 4.40E-06  |
| TMEM41B    | 958.08813 | 3292.278  | 3.436299725 | 2.53E-82  |
| MX1        | 69.823156 | 239.92368 | 3.436162073 | 8.20E-18  |
| DUSP8      | 89.639839 | 307.34281 | 3.428640865 | 1.21E-21  |
| LIN37      | 168.99397 | 579.1095  | 3.426805596 | 2.35E-34  |
| LOC285593  | 15.082399 | 51.636594 | 3.423632604 | 3.31E-05  |
| CFP        | 10.06117  | 34.33983  | 3.413105099 | 0.000777  |
| SLC6A9     | 68.213876 | 232.13105 | 3.402988707 | 3.59E-17  |
| ECE2       | 62.375511 | 212.14814 | 3.401144702 | 4.73E-16  |
| GOLGA3     | 2552.5185 | 8619.5418 | 3.376877251 | 1.19E-99  |
| KIAA1804   | 9.0195019 | 30.405271 | 3.371058736 | 0.001819  |
| C11orf66   | 15.575167 | 52.454102 | 3.367803551 | 3.28E-05  |
| IFIH1      | 132.2985  | 444.91949 | 3.362997174 | 2.69E-15  |
| APBB3      | 191.37433 | 643.34305 | 3.361699816 | 4.42E-36  |
| FAM100A    | 93.956199 | 315.7837  | 3.360967209 | 6.12E-06  |
| TLR9       | 12.674695 | 42.595552 | 3.360676617 | 0.000174  |
| MNT        | 611.04928 | 2051.4488 | 3.357255923 | 2.05E-39  |
| L1CAM      | 21.544509 | 72.259805 | 3.353977812 | 1.27E-06  |
| AMH        | 161.12841 | 539.98126 | 3.351248044 | 4.45E-20  |
| WDR19      | 551.37469 | 1847.5166 | 3.350746053 | 3.95E-64  |
| BTG1       | 1003.7844 | 3354.4657 | 3.341818927 | 9.58E-80  |
| STK19      | 83.464675 | 278.77399 | 3.340023719 | 2.40E-19  |
| LYG1       | 10.098592 | 33.55451  | 3.32269196  | 0.000965  |
| PGM3       | 1297.124  | 4299.5982 | 3.314716363 | 2.13E-84  |
| LAMB4      | 56.655693 | 186.8092  | 3.297271529 | 2.03E-07  |
| RAGE       | 72.854604 | 239.22696 | 3.283621745 | 6.85E-17  |
| THBS1      | 348.40476 | 1138.0668 | 3.266507727 | 4.92E-49  |
| C14orf43   | 1412.843  | 4607.7298 | 3.261317692 | 3.26E-84  |
| NFKBIZ     | 95.989682 | 312.6265  | 3.256876126 | 1.53E-20  |
| FOS        | 530.58491 | 1726.3987 | 3.253765259 | 5.93E-60  |
| CYB5D1     | 476.28079 | 1545.2398 | 3.244388188 | 1.03E-56  |
| YJEFN3     | 20.047496 | 64.998798 | 3.242240306 | 7.07E-06  |

|              |           |           |             |           |
|--------------|-----------|-----------|-------------|-----------|
| GARS         | 6449.8537 | 20886.515 | 3.238292848 | 3.47E-102 |
| ALS2CR12     | 45.041377 | 145.52644 | 3.230950083 | 4.84E-11  |
| TRIM5        | 432.33721 | 1393.5678 | 3.223335358 | 1.68E-53  |
| DNAJC3       | 2871.6506 | 9254.1577 | 3.222591803 | 8.91E-94  |
| VMAC         | 57.659939 | 184.75124 | 3.204152597 | 2.86E-13  |
| GOLGB1       | 2223.7935 | 7118.3682 | 3.201002392 | 3.53E-74  |
| LOC100507034 | 34.032094 | 108.81058 | 3.197292995 | 1.21E-08  |
| DNAJB4       | 336.35381 | 1072.2467 | 3.187853678 | 1.24E-45  |
| RRN3P1       | 26.528316 | 84.341409 | 3.179297464 | 5.61E-07  |
| XBP1         | 2020.8299 | 6419.2802 | 3.176556384 | 3.08E-86  |
| RAB33A       | 62.625035 | 198.82228 | 3.17480504  | 8.00E-14  |
| GORAB        | 286.59686 | 909.03277 | 3.17181691  | 2.62E-41  |
| RND1         | 37.74342  | 119.61954 | 3.169281884 | 2.62E-09  |
| GFPT1        | 2410.4148 | 7634.0613 | 3.16711518  | 1.56E-88  |
| PANX2        | 71.563413 | 225.24453 | 3.147481718 | 1.86E-08  |
| ZNF804B      | 14.608343 | 45.934113 | 3.14437534  | 0.000222  |
| BEST1        | 17.07218  | 53.581723 | 3.138540168 | 6.34E-05  |
| APBA3        | 151.69098 | 476.02148 | 3.138100049 | 9.72E-14  |
| DEDD2        | 194.23738 | 609.36975 | 3.137242434 | 1.03E-31  |
| LOC284454    | 28.062752 | 87.953741 | 3.134180926 | 3.22E-07  |
| GPNMB        | 149.78233 | 469.25991 | 3.132945784 | 1.89E-26  |
| ANKS3        | 143.85669 | 450.42884 | 3.131094263 | 1.81E-25  |
| MAFK         | 170.92134 | 534.76194 | 3.128702001 | 1.86E-07  |
| MC1R         | 138.67949 | 433.77238 | 3.127877002 | 7.33E-25  |
| LRP5L        | 13.66023  | 42.684156 | 3.124702544 | 0.000351  |
| F2RL1        | 11.50205  | 35.886242 | 3.119986599 | 0.00213   |
| ARID3A       | 9.5684025 | 29.797158 | 3.114120512 | 0.003162  |
| CDK20        | 470.99132 | 1465.8799 | 3.112328862 | 2.78E-52  |
| ATG13        | 1309.5803 | 4073.0606 | 3.110202954 | 7.32E-76  |
| CLK1         | 1052.1379 | 3269.7058 | 3.107678073 | 2.55E-65  |
| KRTCAP3      | 16.030512 | 49.780069 | 3.105332427 | 0.00014   |
| GOLT1B       | 1581.8434 | 4911.5738 | 3.104968498 | 7.66E-79  |
| PAIP2B       | 10.005037 | 31.057685 | 3.104204985 | 0.002988  |
| SLC10A7      | 195.2042  | 605.60444 | 3.102414943 | 5.97E-31  |
| BBC3         | 123.51596 | 381.8094  | 3.091174558 | 5.06E-06  |
| TXNL4B       | 516.36335 | 1595.8695 | 3.090594116 | 1.20E-53  |
| DIEXF        | 742.66175 | 2294.3331 | 3.089337903 | 6.35E-51  |
| TXNRD1       | 8012.5606 | 24703.52  | 3.083099232 | 2.74E-95  |
| TUBE1        | 220.2168  | 678.51666 | 3.081130373 | 4.80E-33  |
| MSTO1        | 163.33657 | 502.49219 | 3.076421826 | 4.46E-26  |
| GADD45B      | 104.34802 | 320.2177  | 3.068747314 | 1.89E-19  |
| BMP8A        | 20.028785 | 61.197145 | 3.055459718 | 2.97E-05  |
| P4HA2        | 366.36892 | 1119.107  | 3.054590515 | 5.09E-44  |
| GOLPH3L      | 326.47975 | 994.98912 | 3.047628893 | 3.93E-41  |
| AGAP6        | 52.10852  | 158.42555 | 3.040300346 | 5.91E-11  |
| ZNF587       | 466.21962 | 1415.9631 | 3.037116103 | 2.28E-49  |
| HBP1         | 696.24819 | 2111.0514 | 3.032038666 | 1.03E-58  |



|              |           |           |             |          |
|--------------|-----------|-----------|-------------|----------|
| TFB2M        | 340.02771 | 1029.3289 | 3.027191335 | 1.61E-41 |
| ANKZF1       | 400.75652 | 1213.0934 | 3.027008583 | 1.70E-45 |
| LOC100506472 | 13.491831 | 40.815517 | 3.025202251 | 0.002245 |
| LTB4R        | 162.68783 | 491.7881  | 3.022894127 | 7.27E-26 |
| BLZF1        | 635.71264 | 1921.6488 | 3.022826222 | 2.25E-56 |
| CARS         | 1637.3014 | 4949.1512 | 3.022748944 | 7.34E-76 |
| APOL2        | 653.38357 | 1973.8814 | 3.021014777 | 4.69E-57 |
| HINFP        | 319.07581 | 958.51484 | 3.004034822 | 2.08E-39 |
| GOLGA2       | 2573.433  | 7730.5438 | 3.003980976 | 7.10E-82 |
| DNAJB11      | 2500.3543 | 7491.1888 | 2.996050958 | 1.28E-80 |
| C7orf53      | 18.569193 | 55.615456 | 2.995038844 | 8.12E-05 |
| NAALAD2      | 20.409286 | 61.108541 | 2.994153809 | 4.13E-05 |
| PCK2         | 608.79754 | 1822.5597 | 2.993704189 | 1.54E-54 |
| SLC4A5       | 85.267345 | 254.88871 | 2.9892887   | 1.01E-15 |
| DCAF4L1      | 19.136805 | 56.996774 | 2.97838505  | 6.56E-05 |
| COL7A1       | 81.418761 | 242.47692 | 2.978145548 | 4.25E-15 |
| PNPLA7       | 41.629427 | 123.6427  | 2.97007938  | 8.23E-09 |
| ZHX2         | 328.76891 | 976.12967 | 2.969044984 | 2.33E-39 |
| LOC100271836 | 17.147024 | 50.895576 | 2.968187098 | 0.000158 |
| DSE          | 68.475831 | 202.87763 | 2.962762572 | 5.10E-13 |
| NPRL2        | 437.04035 | 1290.3067 | 2.952374389 | 3.19E-45 |
| PIGA         | 390.34599 | 1152.0292 | 2.951302728 | 9.63E-43 |
| ARMCX1       | 494.52561 | 1457.6567 | 2.947585857 | 9.96E-43 |
| IL18BP       | 73.160261 | 214.8021  | 2.93604881  | 2.03E-13 |
| LONRF3       | 12.069662 | 35.423149 | 2.934891661 | 0.002072 |
| CREB3        | 1367.7892 | 4013.7685 | 2.934493516 | 7.44E-69 |
| PCMTD1       | 207.73549 | 609.05168 | 2.931861445 | 1.24E-28 |
| LIF          | 197.53706 | 578.5578  | 2.928856956 | 1.03E-27 |
| TRIM16       | 598.89862 | 1752.4143 | 2.926061709 | 1.50E-51 |
| FLRT2        | 48.69657  | 142.2886  | 2.921942882 | 1.26E-09 |
| AKNA         | 448.14934 | 1308.88   | 2.920633448 | 5.53E-34 |
| MOCOS        | 14.115576 | 41.169932 | 2.916631488 | 0.000844 |
| PMM2         | 750.28394 | 2188.2083 | 2.916506922 | 2.88E-56 |
| HMOX1        | 668.22273 | 1947.9666 | 2.915145631 | 1.36E-53 |
| FTL          | 6208.5413 | 18096.103 | 2.914710973 | 2.06E-85 |
| CHRNA9       | 34.013383 | 99.04063  | 2.911813562 | 3.53E-07 |
| REC8         | 37.175809 | 108.24677 | 2.911752785 | 9.12E-08 |
| PPAPDC1B     | 753.72717 | 2193.4397 | 2.910124305 | 6.58E-56 |
| ADPRHL1      | 14.078153 | 40.871933 | 2.903216889 | 0.000999 |
| PTPRN        | 67.415452 | 195.05281 | 2.893295325 | 3.27E-12 |
| SP140L       | 146.48892 | 423.60372 | 2.891711609 | 6.31E-22 |
| GNN          | 12.980352 | 37.41258  | 2.882246879 | 0.001887 |
| NFKB1        | 605.43557 | 1744.1908 | 2.880885863 | 3.25E-50 |
| FOSL1        | 211.34698 | 608.52801 | 2.879284145 | 3.62E-28 |
| TGDS         | 295.59765 | 851.07346 | 2.879161803 | 1.42E-34 |
| SSSCA1       | 209.33221 | 602.09663 | 2.876273222 | 5.47E-28 |
| TBC1D23      | 1465.9933 | 4213.3359 | 2.874048547 | 3.68E-67 |

|              |           |           |             |          |
|--------------|-----------|-----------|-------------|----------|
| DOM3Z        | 160.66063 | 461.64448 | 2.873413859 | 3.43E-23 |
| ARFIP2       | 951.88784 | 2735.0439 | 2.873283784 | 1.56E-59 |
| TRIM52       | 204.37339 | 586.6242  | 2.870355048 | 2.66E-27 |
| LOC401233    | 19.04325  | 54.62074  | 2.868246797 | 0.000157 |
| SRP54        | 2283.6554 | 6541.1996 | 2.86435494  | 2.81E-61 |
| GTF2IRD2     | 35.678796 | 102.15768 | 2.863260368 | 3.11E-07 |
| COG3         | 903.5969  | 2585.6719 | 2.861532469 | 1.29E-50 |
| ZNF331       | 667.17478 | 1907.9928 | 2.859809517 | 1.56E-51 |
| EBF2         | 248.0363  | 707.61294 | 2.852860387 | 1.69E-30 |
| DKFZP564C196 | 37.668576 | 107.46145 | 2.852814088 | 1.46E-07 |
| ZNF791       | 472.98738 | 1349.2165 | 2.852542175 | 8.47E-44 |
| ACBD3        | 2269.9826 | 6472.4954 | 2.8513414   | 1.61E-72 |
| NCRNA00346   | 24.120612 | 68.591057 | 2.843669801 | 2.56E-05 |
| PRSS53       | 40.681314 | 115.37487 | 2.836065377 | 6.17E-08 |
| IDI2-AS1     | 20.615107 | 58.345904 | 2.830249852 | 0.000113 |
| PPIL6        | 43.619207 | 123.3447  | 2.827761207 | 3.02E-08 |
| CWC25        | 472.17025 | 1334.7387 | 2.826816713 | 6.02E-43 |
| ZNF550       | 147.94223 | 417.72403 | 2.823561738 | 4.56E-21 |
| ZFAND2A      | 902.0499  | 2540.7041 | 2.816589279 | 5.63E-56 |
| PDIA4        | 8037.5539 | 22619.666 | 2.814247558 | 2.36E-81 |
| KLHL21       | 712.19744 | 2003.175  | 2.812668046 | 2.08E-51 |
| JMJD6        | 717.10641 | 2016.767  | 2.812367864 | 2.52E-51 |
| OPTN         | 1900.0895 | 5340.8437 | 2.810837986 | 3.08E-68 |
| CIR1         | 368.18402 | 1033.9602 | 2.808270229 | 3.78E-37 |
| NAMPT        | 2575.1112 | 7230.8596 | 2.807979506 | 3.56E-56 |
| LOC146880    | 179.11756 | 502.23053 | 2.803915689 | 1.27E-23 |
| MAN1A1       | 555.05488 | 1556.3187 | 2.803900553 | 1.72E-45 |
| NAT9         | 610.26341 | 1710.7813 | 2.803348947 | 1.19E-47 |
| SEPHS2       | 1188.6903 | 3330.3672 | 2.801711351 | 1.98E-60 |
| CREB5        | 1314.8761 | 3681.0708 | 2.799557199 | 5.52E-62 |
| POFUT2       | 1171.5683 | 3279.2134 | 2.798994666 | 3.03E-60 |
| HPX          | 19.648283 | 54.930853 | 2.795707499 | 0.000206 |
| CYP4F11      | 169.81111 | 474.66439 | 2.7952493   | 1.00E-22 |
| GMPPB        | 386.40385 | 1079.8296 | 2.79456222  | 6.43E-22 |
| PHGDH        | 506.97577 | 1416.575  | 2.794167086 | 1.35E-43 |
| LARP6        | 583.27347 | 1628.8924 | 2.792673578 | 1.78E-46 |
| CCRN4L       | 134.77477 | 374.58474 | 2.779338737 | 4.25E-19 |
| MAFG         | 1829.3679 | 5078.5524 | 2.776124098 | 1.98E-66 |
| TMF1         | 1887.3151 | 5238.912  | 2.775854479 | 1.83E-41 |
| TTLL11       | 86.383857 | 239.50489 | 2.772565338 | 1.65E-13 |
| RNMT         | 1765.3147 | 4892.686  | 2.771565873 | 2.02E-65 |
| CCDC40       | 78.331179 | 216.91232 | 2.769169609 | 1.44E-12 |
| MTRNR2L2     | 18.076426 | 50.033766 | 2.767901493 | 0.000407 |
| CBLB         | 434.32699 | 1201.8979 | 2.767264971 | 1.76E-39 |
| PDE4C        | 19.080672 | 52.752101 | 2.764687824 | 0.000267 |
| BEX4         | 358.67175 | 990.53505 | 2.761675672 | 2.44E-35 |
| KLHL28       | 701.09474 | 1935.4703 | 2.760640212 | 1.13E-48 |

|              |           |           |             |          |
|--------------|-----------|-----------|-------------|----------|
| N4BP2        | 885.18982 | 2442.2678 | 2.759032802 | 3.78E-53 |
| LOC150622    | 35.603951 | 98.211008 | 2.758430004 | 9.84E-07 |
| STX5         | 776.78112 | 2142.5885 | 2.758291131 | 8.84E-51 |
| DND1         | 37.799554 | 104.04639 | 2.752582621 | 4.41E-07 |
| CCT6P1       | 171.88202 | 472.83209 | 2.750910783 | 6.19E-22 |
| C17orf51     | 710.25137 | 1953.8099 | 2.750871034 | 7.14E-49 |
| NBR2         | 65.824883 | 180.80457 | 2.746751084 | 8.42E-11 |
| RCAN1        | 5306.2297 | 14574.468 | 2.746671105 | 3.53E-75 |
| RHBDL1       | 24.688224 | 67.761435 | 2.744686508 | 4.09E-05 |
| C9orf72      | 554.27517 | 1520.6581 | 2.743507553 | 7.58E-21 |
| NPHP3-ACAD11 | 67.328177 | 184.52973 | 2.740750482 | 2.45E-07 |
| ZNF417       | 242.69071 | 664.56641 | 2.738326592 | 1.81E-27 |
| FICD         | 283.30961 | 774.9677  | 2.735409197 | 2.70E-30 |
| PILRB        | 926.00211 | 2530.6721 | 2.732901027 | 3.04E-53 |
| SH2D5        | 25.598915 | 69.928073 | 2.731681182 | 3.70E-05 |
| TMEM71       | 151.65984 | 414.24045 | 2.731378644 | 5.76E-20 |
| ARL5B        | 826.33225 | 2254.2544 | 2.728024291 | 1.06E-50 |
| EN2          | 19.498595 | 53.138704 | 2.725258091 | 0.002273 |
| STC2         | 96.881662 | 263.77262 | 2.72262692  | 1.57E-09 |
| CCDC57       | 163.74821 | 444.87519 | 2.716824696 | 2.43E-12 |
| CCDC9        | 441.99917 | 1198.8088 | 2.712242324 | 1.79E-32 |
| DUSP10       | 67.134786 | 182.0651  | 2.711933804 | 1.36E-10 |
| SLC47A2      | 18.587904 | 50.376068 | 2.710153137 | 0.000461 |
| LRIF1        | 840.26071 | 2277.1772 | 2.710084101 | 2.67E-50 |
| ZBTB49       | 130.66423 | 353.66353 | 2.706659088 | 1.49E-17 |
| PPM1K        | 275.44404 | 744.64308 | 2.703427816 | 6.16E-29 |
| GTPBP2       | 877.41153 | 2368.4169 | 2.699322734 | 6.71E-51 |
| ERO1LB       | 339.34784 | 915.57698 | 2.698048689 | 1.55E-32 |
| KLF6         | 3480.1862 | 9388.6453 | 2.697742259 | 9.98E-70 |
| UBE2B        | 740.47858 | 1996.3816 | 2.696069327 | 2.18E-47 |
| GCC1         | 825.85819 | 2224.3888 | 2.693427006 | 2.13E-49 |
| PDLIM1       | 81.911528 | 219.95288 | 2.685249402 | 4.04E-12 |
| ZNF622       | 530.54121 | 1423.3328 | 2.682794046 | 8.66E-41 |
| GRIN2C       | 26.203948 | 70.270374 | 2.681671238 | 4.16E-05 |
| PDIA2        | 52.807109 | 141.49116 | 2.679396119 | 1.15E-08 |
| LOC646999    | 19.155516 | 51.249991 | 2.675469099 | 0.000505 |
| NKX6-1       | 69.573632 | 185.99966 | 2.673421677 | 1.16E-10 |
| UFM1         | 2764.4522 | 7384.6259 | 2.671279968 | 8.33E-36 |
| CCDC39       | 43.600496 | 116.22872 | 2.665765881 | 0.002208 |
| ATP6V1C2     | 31.512124 | 83.942692 | 2.663822113 | 1.10E-05 |
| IRF7         | 97.729939 | 259.97097 | 2.660095456 | 6.16E-08 |
| LOC100129917 | 35.03634  | 92.983734 | 2.653922592 | 4.18E-06 |
| SLCO3A1      | 32.628636 | 86.439517 | 2.649191885 | 7.41E-06 |
| GNL3         | 1753.2202 | 4640.3028 | 2.646731318 | 3.15E-38 |
| MAP7         | 50.231005 | 132.89314 | 2.645639643 | 4.59E-08 |
| TBC1D15      | 1430.0089 | 3783.2247 | 2.64559529  | 1.10E-36 |
| CCDC96       | 30.108666 | 79.488624 | 2.640058012 | 2.02E-05 |

|              |           |           |             |          |
|--------------|-----------|-----------|-------------|----------|
| CELSR3       | 849.29879 | 2241.8908 | 2.63969615  | 4.66E-48 |
| ASB3         | 34.730683 | 91.634603 | 2.638433685 | 4.41E-06 |
| MTHFD2       | 1049.2935 | 2757.7936 | 2.628238419 | 4.71E-51 |
| STAT2        | 1585.6981 | 4166.3829 | 2.627475466 | 2.72E-57 |
| COL4A3       | 15.10111  | 39.655708 | 2.626012731 | 0.002554 |
| C20orf111    | 889.60602 | 2333.7753 | 2.623380694 | 6.51E-48 |
| NEAT1        | 2888.5671 | 7563.884  | 2.618559244 | 7.49E-35 |
| PNPLA8       | 1784.7884 | 4667.8364 | 2.615344357 | 4.07E-58 |
| C14orf45     | 87.69376  | 229.27185 | 2.614460245 | 1.13E-10 |
| PVT1         | 66.966387 | 174.96918 | 2.612791153 | 1.01E-09 |
| C10orf118    | 239.31618 | 624.93493 | 2.611335925 | 2.08E-24 |
| ZFPL1        | 418.89523 | 1087.8759 | 2.597011985 | 8.87E-18 |
| KIAA1024     | 98.665621 | 256.19354 | 2.596583671 | 7.06E-13 |
| LOC100130705 | 72.667494 | 188.67369 | 2.596397341 | 2.87E-10 |
| KCNT2        | 108.85777 | 282.57565 | 2.595824374 | 6.98E-14 |
| MYH3         | 42.745939 | 110.93291 | 2.59516845  | 8.18E-07 |
| WDR85        | 466.52527 | 1210.2301 | 2.59413616  | 1.58E-35 |
| CCT6P3       | 81.156806 | 210.51728 | 2.593957145 | 0.000191 |
| WDR45        | 317.19829 | 822.36378 | 2.592585768 | 1.66E-28 |
| TECTA        | 50.100028 | 129.87681 | 2.592349947 | 1.27E-07 |
| TMOD1        | 245.92798 | 637.34257 | 2.591582221 | 1.40E-24 |
| TMEM45A      | 253.26335 | 655.88394 | 2.589730925 | 6.45E-17 |
| SELS         | 2400.784  | 6212.0167 | 2.587495071 | 1.57E-60 |
| SLC37A1      | 36.589486 | 94.663051 | 2.587165358 | 4.96E-06 |
| CCDC146      | 103.43733 | 267.38115 | 2.584958018 | 1.39E-08 |
| HK2          | 453.42637 | 1170.5944 | 2.581663778 | 9.35E-35 |
| ZCCHC7       | 481.20846 | 1241.6986 | 2.580375656 | 1.33E-35 |
| FAM174B      | 35.167317 | 90.551284 | 2.574870412 | 7.82E-06 |
| KCTD15       | 721.46647 | 1855.6955 | 2.57211602  | 1.18E-42 |
| PLEKHM1P     | 92.315777 | 237.09667 | 2.568322269 | 6.63E-12 |
| PAWR         | 79.678504 | 204.61336 | 2.567986985 | 1.23E-10 |
| ELL2         | 209.17009 | 537.12206 | 2.567872188 | 1.49E-21 |
| USP53        | 157.4982  | 404.18462 | 2.566280785 | 1.08E-17 |
| FIBIN        | 391.75573 | 1004.6583 | 2.564501966 | 1.62E-31 |
| C3orf19      | 512.5709  | 1312.1583 | 2.559954737 | 5.11E-36 |
| TAF4B        | 25.580204 | 65.441817 | 2.558299317 | 0.000178 |
| SEMA3D       | 42.197038 | 107.94877 | 2.558207167 | 1.56E-06 |
| LONP1        | 3237.4951 | 8280.5037 | 2.557688426 | 2.21E-31 |
| ANKRD33B     | 184.34461 | 471.19707 | 2.556066471 | 1.57E-19 |
| JUND         | 715.33475 | 1824.0497 | 2.549924697 | 2.43E-13 |
| OSBP         | 2474.0192 | 6307.2598 | 2.549398082 | 7.21E-59 |
| TLCD2        | 86.234169 | 219.56628 | 2.54616334  | 3.93E-11 |
| ATAD3B       | 142.27855 | 362.18091 | 2.545576367 | 3.70E-06 |
| CYLD         | 930.58671 | 2367.833  | 2.544451777 | 1.10E-45 |
| TSSK4        | 36.11543  | 91.888301 | 2.544294808 | 8.30E-06 |
| FAM8A1       | 850.62126 | 2159.9015 | 2.539204707 | 6.70E-44 |
| LOC283624    | 715.85264 | 1817.5782 | 2.53903962  | 2.64E-41 |

|              |           |           |             |          |
|--------------|-----------|-----------|-------------|----------|
| NFKBIA       | 610.42553 | 1547.7286 | 2.535491296 | 2.34E-38 |
| LOC100131691 | 54.62849  | 138.44264 | 2.534257126 | 9.66E-08 |
| BET1L        | 1627.053  | 4112.354  | 2.527486155 | 3.40E-53 |
| LOC399744    | 25.124858 | 63.440273 | 2.525000224 | 0.000224 |
| CLCN6        | 1145.4641 | 2889.3217 | 2.522402758 | 5.37E-48 |
| WBP1         | 25.106147 | 63.218763 | 2.518059134 | 0.000227 |
| C22orf23     | 418.27777 | 1053.0934 | 2.517689245 | 3.02E-31 |
| ZNF598       | 533.84704 | 1343.8359 | 2.5172676   | 8.52E-15 |
| ZGLP1        | 28.74263  | 72.348409 | 2.517111691 | 8.18E-05 |
| GPRC5A       | 58.452083 | 147.11715 | 2.516884702 | 3.53E-08 |
| CALCOCO1     | 819.73301 | 2060.5947 | 2.513738852 | 1.90E-42 |
| LBH          | 203.36915 | 511.15874 | 2.513452739 | 3.29E-20 |
| SLC30A7      | 865.26074 | 2172.8366 | 2.51119287  | 2.69E-43 |
| ZNF295       | 1344.8849 | 3368.2591 | 2.504496184 | 2.23E-49 |
| GRIK2        | 39.751912 | 99.503722 | 2.503117883 | 4.94E-06 |
| IARS         | 6181.0777 | 15469.38  | 2.502699555 | 2.70E-63 |
| ADCK3        | 278.55661 | 696.78391 | 2.501408611 | 2.06E-24 |
| SLU7         | 781.80235 | 1955.5377 | 2.501319788 | 3.39E-41 |
| LRRC48       | 30.788543 | 76.979684 | 2.500270425 | 5.59E-05 |
| DERL1        | 2366.5773 | 5916.8884 | 2.500188064 | 4.56E-56 |
| BET1         | 485.89289 | 1214.4588 | 2.499437336 | 4.24E-33 |
| FAM114A1     | 886.98621 | 2211.9164 | 2.493743828 | 5.92E-43 |
| THSD1P1      | 113.21155 | 282.28976 | 2.493471396 | 5.06E-13 |
| LRRC49       | 437.33358 | 1090.3932 | 2.493275704 | 3.40E-31 |
| CCNT1        | 470.42999 | 1172.5036 | 2.492408233 | 2.27E-32 |
| CTSK         | 99.214521 | 247.22103 | 2.4917827   | 8.15E-10 |
| HMGA2        | 70.771268 | 176.18541 | 2.48950473  | 3.90E-09 |
| MYO5B        | 127.00904 | 316.02944 | 2.48824371  | 3.44E-14 |
| OSBPL2       | 1100.0297 | 2735.9784 | 2.487185827 | 5.88E-46 |
| HIVEP2       | 264.22893 | 656.85443 | 2.485929217 | 3.21E-23 |
| NMNAT2       | 468.74587 | 1164.1309 | 2.483501095 | 3.45E-32 |
| NFXL1        | 350.90602 | 870.49672 | 2.480711851 | 2.63E-27 |
| EHD4         | 314.78431 | 780.28358 | 2.478788049 | 8.98E-26 |
| LOC100505783 | 345.19863 | 855.15304 | 2.477278202 | 4.21E-27 |
| QPCTL        | 191.73612 | 474.93816 | 2.477040619 | 1.08E-16 |
| TRMT1        | 690.92117 | 1711.216  | 2.476716703 | 6.81E-36 |
| TGIF1        | 1066.7525 | 2636.7765 | 2.471779036 | 6.76E-45 |
| RBM44        | 20.047496 | 49.526372 | 2.470451802 | 0.001604 |
| NCRNA00174   | 149.40182 | 368.98298 | 2.469735417 | 1.20E-15 |
| DDX18        | 1654.6606 | 4085.5898 | 2.469140729 | 1.85E-50 |
| CCDC144B     | 67.172208 | 165.73086 | 2.467253407 | 1.54E-08 |
| SLC1A5       | 1735.9231 | 4282.18   | 2.466802832 | 1.76E-30 |
| LTN1         | 1734.2331 | 4277.727  | 2.466639017 | 1.83E-40 |
| CRIPT        | 330.63399 | 815.30005 | 2.465868839 | 5.21E-26 |
| PARD6B       | 37.082254 | 91.215812 | 2.459823863 | 2.03E-05 |
| MAGEH1       | 85.741402 | 210.87965 | 2.459484556 | 3.31E-10 |
| ACCN4        | 59.269218 | 145.61504 | 2.456840958 | 9.70E-08 |

|              |           |           |             |          |
|--------------|-----------|-----------|-------------|----------|
| GOLGA5       | 1650.8182 | 4055.3132 | 2.45654738  | 6.85E-50 |
| IKZF5        | 140.46345 | 344.96479 | 2.455904341 | 9.25E-15 |
| PKD1P1       | 35.697507 | 87.61144  | 2.454273378 | 2.44E-05 |
| EGR2         | 175.19413 | 429.89008 | 2.453792733 | 2.88E-17 |
| ARMCX3       | 2970.1727 | 7287.0465 | 2.453408359 | 7.16E-56 |
| DGCR9        | 20.652529 | 50.553275 | 2.447800666 | 0.001313 |
| LOC144438    | 949.20588 | 2322.6482 | 2.446938281 | 1.10E-31 |
| ZNF805       | 418.7144  | 1023.4735 | 2.44432358  | 3.85E-29 |
| CHCHD7       | 218.28943 | 533.55403 | 2.444250426 | 1.38E-18 |
| TUBA8        | 27.49514  | 66.943927 | 2.434754903 | 0.000266 |
| RGS10        | 38.030366 | 92.287018 | 2.426666537 | 2.14E-05 |
| ZNF432       | 288.4868  | 699.3856  | 2.424324419 | 6.52E-21 |
| ACRC         | 40.169835 | 97.304896 | 2.422337434 | 1.28E-05 |
| DDR2         | 1019.7151 | 2469.2697 | 2.421529128 | 3.28E-42 |
| UGDH         | 788.40172 | 1908.8546 | 2.421170014 | 2.93E-38 |
| XPOT         | 4513.8237 | 10920.838 | 2.419420559 | 4.18E-57 |
| BOD1L        | 2257.7194 | 5459.2633 | 2.418043266 | 1.24E-51 |
| KIAA0913     | 1197.0674 | 2888.4595 | 2.412946497 | 3.80E-44 |
| ATXN1        | 882.34535 | 2128.7185 | 2.412568406 | 5.42E-40 |
| DCUN1D3      | 123.92146 | 298.74479 | 2.410759196 | 7.33E-13 |
| SEC31A       | 5773.4848 | 13917.515 | 2.410591837 | 3.83E-58 |
| NCRNA00338   | 161.66488 | 389.70691 | 2.410584867 | 1.60E-15 |
| METTL19      | 165.77542 | 399.37613 | 2.409139693 | 7.40E-16 |
| 1-Mar        | 36.134141 | 86.97114  | 2.406896571 | 4.08E-05 |
| LOC100506710 | 1486.7207 | 3576.3557 | 2.405533053 | 2.09E-46 |
| ZNF697       | 140.53829 | 337.48643 | 2.401384167 | 4.36E-10 |
| GDPD3        | 26.185237 | 62.876462 | 2.401217969 | 0.000427 |
| LOC646851    | 112.38198 | 269.57997 | 2.398782815 | 1.01E-11 |
| ATF6         | 3490.7277 | 8371.29   | 2.398150402 | 2.30E-54 |
| NUB1         | 1150.9658 | 2759.8716 | 2.397874684 | 8.82E-43 |
| FAM86HP      | 19.536017 | 46.828111 | 2.397014217 | 0.002399 |
| EXT1         | 750.77056 | 1795.7993 | 2.391941609 | 1.82E-36 |
| ATXN3        | 223.53519 | 534.62523 | 2.391682637 | 6.10E-19 |
| LOC100289019 | 85.909801 | 205.45094 | 2.391472698 | 1.08E-09 |
| ZNF202       | 343.26498 | 819.7742  | 2.388167264 | 9.38E-25 |
| PLK1S1       | 306.14531 | 729.83518 | 2.383950236 | 2.10E-19 |
| PPIEL        | 65.163716 | 155.2199  | 2.381998819 | 1.06E-07 |
| FTSJ1        | 742.36224 | 1767.5444 | 2.380972981 | 4.00E-36 |
| SAMD4A       | 1047.8651 | 2494.7499 | 2.380793007 | 6.50E-41 |
| CEBPD        | 229.16145 | 545.55499 | 2.380657742 | 4.33E-19 |
| GFPT2        | 22.548755 | 53.670327 | 2.380190261 | 0.001383 |
| ZDBF2        | 116.72334 | 277.64637 | 2.378670648 | 7.28E-12 |
| MARS         | 3330.1732 | 7918.2712 | 2.377735578 | 4.55E-53 |
| LIME1        | 69.099575 | 164.23671 | 2.376812137 | 6.23E-06 |
| NFKBIB       | 277.14687 | 658.01008 | 2.37422878  | 1.27E-21 |
| NCOA7        | 259.76289 | 615.98665 | 2.37134203  | 6.54E-08 |
| RELA         | 1487.9118 | 3527.8639 | 2.371016841 | 1.61E-34 |

|              |           |           |             |          |
|--------------|-----------|-----------|-------------|----------|
| DNAH1        | 217.73425 | 516.20881 | 2.37082046  | 2.27E-18 |
| BICC1        | 26.621872 | 62.932878 | 2.363953936 | 0.000613 |
| LYST         | 1209.7108 | 2857.5147 | 2.362146953 | 3.33E-42 |
| C16orf46     | 47.542636 | 112.30212 | 2.362134835 | 5.03E-06 |
| GOLGA4       | 3993.9986 | 9430.7429 | 2.361228412 | 3.06E-53 |
| SLC1A4       | 1585.2239 | 3740.5519 | 2.359636326 | 2.28E-45 |
| C1orf9       | 6332.4196 | 14939.786 | 2.359253942 | 1.12E-55 |
| ANKRD10      | 1313.666  | 3098.4213 | 2.358606581 | 8.30E-43 |
| PRNP         | 9812.6369 | 23136.977 | 2.357875602 | 3.29E-57 |
| NANS         | 627.69738 | 1478.5696 | 2.355545269 | 1.06E-32 |
| ZNF140       | 540.42783 | 1271.8744 | 2.353458384 | 3.09E-30 |
| TBC1D17      | 369.51878 | 867.59287 | 2.347899228 | 1.93E-15 |
| CRABP2       | 35.03634  | 82.219073 | 2.346679845 | 0.000107 |
| KIAA0907     | 1138.7276 | 2669.2158 | 2.344033747 | 2.09E-40 |
| CBS          | 1721.3522 | 4034.6931 | 2.343909182 | 6.55E-21 |
| MDM4         | 792.2066  | 1855.7723 | 2.342535786 | 2.06E-35 |
| YIPF2        | 308.78997 | 723.319   | 2.342430308 | 2.60E-22 |
| ANKRD11      | 2330.8109 | 5442.3728 | 2.334969733 | 3.43E-48 |
| SLC3A2       | 5569.5664 | 13003.134 | 2.33467616  | 3.72E-54 |
| MEG3         | 971.80449 | 2266.7185 | 2.332484066 | 7.49E-38 |
| TULP3        | 1652.7019 | 3854.4368 | 2.332203273 | 1.77E-44 |
| ATP8B2       | 1102.0944 | 2570.171  | 2.332078915 | 1.31E-39 |
| SEC16A       | 3939.0576 | 9179.7793 | 2.33045065  | 4.99E-52 |
| NDEL1        | 849.27393 | 1978.3355 | 2.329443323 | 4.44E-36 |
| SLC35E1      | 2031.8888 | 4729.5849 | 2.327678988 | 1.76E-46 |
| GCC2         | 642.72993 | 1494.6948 | 2.325540979 | 2.48E-18 |
| WDR81        | 715.64054 | 1662.0922 | 2.322523769 | 4.07E-09 |
| CDK11A       | 79.148315 | 183.7323  | 2.321367172 | 1.41E-06 |
| FAM160B1     | 284.14545 | 658.42507 | 2.317211348 | 2.17E-20 |
| CCDC28A      | 143.08325 | 331.28451 | 2.315326952 | 1.32E-10 |
| LOC100507577 | 58.589341 | 135.62359 | 2.314816767 | 1.16E-06 |
| DPH2         | 554.47471 | 1282.3933 | 2.312807607 | 1.65E-29 |
| SH3RF3       | 170.83407 | 395.04286 | 2.312436062 | 1.14E-14 |
| LOC100132247 | 21.656775 | 50.033766 | 2.310305479 | 0.002461 |
| ARL1         | 1534.0325 | 3540.4214 | 2.307918104 | 2.28E-42 |
| DHDDS        | 1048.6511 | 2417.9997 | 2.305819067 | 6.72E-38 |
| COPA         | 9587.5983 | 22103.599 | 2.305436467 | 1.61E-54 |
| MYBBP1A      | 997.45313 | 2298.6577 | 2.304527046 | 4.48E-31 |
| SMCR8        | 1186.5946 | 2733.429  | 2.303591338 | 2.00E-39 |
| RNASE4       | 460.17543 | 1060.0121 | 2.303495743 | 1.76E-26 |
| LOC401588    | 161.72101 | 372.39803 | 2.302718911 | 6.63E-14 |
| RNF39        | 27.058506 | 62.26835  | 2.30124864  | 0.000791 |
| ARID3B       | 37.687287 | 86.693215 | 2.300330448 | 0.000894 |
| LOX          | 37.19452  | 85.46903  | 2.297893078 | 0.000317 |
| TRPV1        | 81.836684 | 187.90048 | 2.296042221 | 1.92E-08 |
| C7orf41      | 839.12549 | 1926.3324 | 2.295642781 | 1.23E-34 |
| FBLL1        | 49.470003 | 113.42974 | 2.292899338 | 3.61E-05 |

|          |           |           |             |          |
|----------|-----------|-----------|-------------|----------|
| C17orf56 | 187.85011 | 430.55461 | 2.292011441 | 2.82E-15 |
| UCP3     | 28.193729 | 64.567894 | 2.290150892 | 0.000685 |
| NEDD4    | 914.88684 | 2094.089  | 2.288904922 | 2.12E-35 |
| GORASP2  | 2381.7781 | 5449.4767 | 2.287986694 | 4.87E-46 |
| TMEM151A | 155.31503 | 355.20994 | 2.287028718 | 2.26E-13 |
| MIB2     | 277.59594 | 634.35427 | 2.285171297 | 1.68E-05 |
| WDR74    | 349.75208 | 798.45427 | 2.282914969 | 2.74E-22 |
| GZF1     | 1468.4883 | 3351.6266 | 2.282365199 | 6.66E-41 |
| RAB33B   | 403.33891 | 920.09958 | 2.281207107 | 5.20E-24 |
| WIPF3    | 21.581931 | 49.216259 | 2.280438135 | 0.003286 |
| ARHGEF2  | 3968.9604 | 9044.506  | 2.278809815 | 1.87E-49 |
| ZNF740   | 743.18566 | 1693.3918 | 2.278558191 | 1.85E-32 |
| YIPF5    | 1309.2685 | 2982.9215 | 2.27831146  | 2.12E-39 |
| APOL6    | 1026.907  | 2339.2884 | 2.27799433  | 2.05E-36 |
| RNF145   | 2052.4542 | 4673.4624 | 2.277011784 | 5.49E-44 |
| DUSP1    | 115.01422 | 261.86383 | 2.276795264 | 1.41E-10 |
| ZER1     | 880.78593 | 2003.6945 | 2.274893868 | 2.36E-26 |
| UBE4A    | 2571.6992 | 5848.6158 | 2.274222365 | 7.37E-46 |
| C12orf23 | 2456.498  | 5574.8036 | 2.26941103  | 2.14E-35 |
| ARFGEF2  | 2518.5801 | 5714.3614 | 2.26888211  | 1.82E-45 |
| HSPA9    | 9404.9381 | 21331.27  | 2.268092566 | 2.69E-52 |
| PDXDC1   | 2087.085  | 4731.1354 | 2.266862806 | 8.68E-44 |
| PYCR1    | 1205.6688 | 2732.6755 | 2.266522467 | 3.88E-15 |
| CCNL1    | 1092.4387 | 2474.4209 | 2.265043231 | 1.56E-36 |
| SLC30A5  | 1727.3716 | 3908.9212 | 2.262930076 | 5.65E-41 |
| TBRG1    | 1018.4052 | 2303.1284 | 2.261505024 | 1.10E-35 |
| SNORA70  | 34.50615  | 77.885796 | 2.257156923 | 0.000266 |
| ZNF596   | 255.82075 | 577.37792 | 2.256962839 | 8.21E-18 |
| KCNAB1   | 40.569048 | 91.558114 | 2.256846506 | 8.41E-05 |
| ZXDC     | 1527.5266 | 3445.0813 | 2.255333186 | 2.61E-40 |
| ENTPD7   | 172.90497 | 389.83981 | 2.254647775 | 1.06E-13 |
| SEC23IP  | 1229.64   | 2772.2834 | 2.254548816 | 1.17E-37 |
| ANG      | 102.98198 | 231.90954 | 2.251942898 | 1.34E-09 |
| PPP1R15B | 2267.5999 | 5101.9431 | 2.249930907 | 1.47E-43 |
| C1orf52  | 463.54996 | 1042.4375 | 2.248813612 | 5.01E-25 |
| C1orf55  | 1291.4416 | 2902.4828 | 2.247475026 | 1.99E-22 |
| SLC6A6   | 379.3617  | 851.37562 | 2.244231858 | 2.49E-22 |
| SRPR     | 3745.775  | 8406.1774 | 2.244175739 | 4.41E-47 |
| ERN1     | 192.7965  | 432.60046 | 2.243819046 | 1.14E-14 |
| ATF5     | 858.10632 | 1920.94   | 2.238580403 | 8.07E-33 |
| CATSPERG | 24.669513 | 55.184551 | 2.236953399 | 0.002192 |
| KCNH2    | 86.552257 | 193.53443 | 2.236041447 | 0.002311 |
| IFITM10  | 57.279438 | 127.96386 | 2.234027945 | 4.38E-06 |
| ORAOV1   | 249.22766 | 556.40029 | 2.232498163 | 5.05E-17 |
| SUPV3L1  | 430.27887 | 960.19415 | 2.231562435 | 1.22E-23 |
| GOT1     | 1105.9181 | 2466.612  | 2.230374912 | 1.97E-35 |
| TTBK1    | 306.28872 | 683.09948 | 2.230246961 | 1.33E-19 |



|              |           |           |             |          |
|--------------|-----------|-----------|-------------|----------|
| SEC23B       | 3771.3241 | 8405.0657 | 2.228677658 | 2.28E-46 |
| NME7         | 428.75686 | 955.4542  | 2.228428946 | 1.59E-23 |
| MED8         | 706.47148 | 1573.8934 | 2.227822957 | 9.70E-30 |
| ARHGAP39     | 272.0071  | 605.47949 | 2.22596946  | 6.82E-11 |
| SLC25A34     | 47.311823 | 105.29481 | 2.225549564 | 2.65E-05 |
| MCEE         | 149.50166 | 332.65372 | 2.225083762 | 4.95E-12 |
| MEF2D        | 998.33268 | 2219.4069 | 2.223113513 | 3.58E-34 |
| CREBZF       | 1560.6669 | 3465.7374 | 2.220677174 | 1.02E-16 |
| DDX51        | 654.23185 | 1452.6547 | 2.220397465 | 9.19E-29 |
| ELP2         | 1216.8405 | 2701.8358 | 2.220369781 | 3.54E-36 |
| JUNB         | 334.52602 | 742.01715 | 2.218114928 | 4.22E-05 |
| RBM39        | 4580.7401 | 10160.324 | 2.218052925 | 9.02E-47 |
| LOC100128542 | 31.62439  | 70.105281 | 2.216810538 | 0.000665 |
| ENO3         | 62.16969  | 137.70162 | 2.214931791 | 2.84E-06 |
| KLHL24       | 1473.1103 | 3258.6916 | 2.212116514 | 1.21E-21 |
| ZNF526       | 272.77438 | 603.30074 | 2.211720687 | 7.51E-18 |
| ZNF561       | 743.77198 | 1641.5659 | 2.207082138 | 5.46E-30 |
| ESCO1        | 1080.2256 | 2379.5965 | 2.202869916 | 4.64E-34 |
| PSAT1        | 3192.7223 | 7031.8999 | 2.202477754 | 5.53E-44 |
| LY6G5B       | 68.120321 | 150.02481 | 2.202350302 | 1.31E-06 |
| SPATA2       | 477.50956 | 1050.8742 | 2.200739562 | 2.90E-24 |
| NUS1         | 512.85156 | 1127.9065 | 2.19928449  | 7.41E-25 |
| RALA         | 3594.421  | 7902.2596 | 2.198479167 | 1.82E-44 |
| HSPA13       | 5664.858  | 12449.671 | 2.197702282 | 1.12E-46 |
| MYADM        | 1518.9561 | 3336.9952 | 2.196900304 | 1.91E-19 |
| CCDC66       | 279.69812 | 614.31529 | 2.196351201 | 4.84E-14 |
| LOC284408    | 42.159616 | 92.585017 | 2.196059289 | 0.000106 |
| LOC645513    | 38.198766 | 83.886276 | 2.196046765 | 0.000199 |
| XPNPEP3      | 710.42605 | 1559.8867 | 2.195705975 | 8.02E-29 |
| TAF13        | 617.16216 | 1354.2264 | 2.194279675 | 5.45E-27 |
| LOC401097    | 25.068725 | 55.007343 | 2.194261692 | 0.00274  |
| TRIM69       | 53.624244 | 117.50932 | 2.191346805 | 1.79E-05 |
| NOL6         | 1071.0813 | 2345.8243 | 2.190145908 | 1.20E-33 |
| TRPM8        | 265.6511  | 581.66689 | 2.189589597 | 8.01E-14 |
| C12orf44     | 819.78901 | 1793.0083 | 2.18715828  | 2.02E-30 |
| C1orf63      | 402.59033 | 879.90429 | 2.185607089 | 7.00E-21 |
| SCD          | 42297.523 | 92223.925 | 2.180362283 | 7.56E-50 |
| MIR3064      | 91.804299 | 199.92567 | 2.177737562 | 4.92E-08 |
| NPIP         | 25.52407  | 55.48255  | 2.173734397 | 0.002946 |
| FNBP4        | 1517.5029 | 3297.3883 | 2.172904034 | 1.39E-36 |
| KLRAP1       | 89.66483  | 194.79911 | 2.172525326 | 9.39E-08 |
| NOXO1        | 43.219995 | 93.889845 | 2.172370562 | 0.00012  |
| FAM160A2     | 328.63793 | 713.30331 | 2.170483832 | 1.02E-18 |
| MVD          | 1325.5482 | 2873.3249 | 2.167650303 | 1.22E-08 |
| FGF2         | 781.95204 | 1694.8177 | 2.167419049 | 6.02E-29 |
| GOSR1        | 1523.5097 | 3301.7741 | 2.167215697 | 2.95E-36 |
| LENG8        | 1414.8763 | 3064.1375 | 2.165657496 | 1.03E-35 |

|           |           |           |             |          |
|-----------|-----------|-----------|-------------|----------|
| ZNF785    | 156.0199  | 337.76816 | 2.1649043   | 6.07E-11 |
| KLF9      | 82.878352 | 179.29035 | 2.163295245 | 2.22E-07 |
| MED10     | 920.67523 | 1991.5246 | 2.1631131   | 9.19E-31 |
| ALG2      | 1081.0365 | 2338.3096 | 2.16302563  | 1.26E-32 |
| KDELR3    | 1012.6105 | 2189.211  | 2.161947743 | 6.32E-32 |
| ZNF667    | 344.53746 | 744.30078 | 2.160289818 | 4.57E-19 |
| TMEM86B   | 70.353345 | 151.88133 | 2.158836002 | 1.71E-06 |
| SOX7      | 27.607406 | 59.594317 | 2.158635117 | 0.002231 |
| UBN2      | 772.78285 | 1667.9926 | 2.158423445 | 1.68E-28 |
| GBP5      | 66.355073 | 143.19471 | 2.158006944 | 3.36E-06 |
| ARMCX4    | 80.738883 | 174.20809 | 2.157672784 | 4.30E-07 |
| EPRS      | 7031.5243 | 15170.568 | 2.157507701 | 1.74E-45 |
| HYAL3     | 72.343126 | 156.06959 | 2.157352053 | 1.23E-06 |
| SLC33A1   | 681.22179 | 1469.6213 | 2.157331628 | 4.51E-27 |
| CCDC30    | 25.655048 | 55.317456 | 2.156201654 | 0.003326 |
| PLEKHH2   | 554.3313  | 1193.7629 | 2.153518914 | 1.60E-24 |
| SEPT7P2   | 158.30906 | 340.85718 | 2.153112247 | 5.11E-09 |
| NOP58     | 1427.1895 | 3072.5629 | 2.152876585 | 6.72E-35 |
| SH3BP5L   | 957.3707  | 2059.6685 | 2.15138037  | 6.77E-31 |
| ZRSR2     | 109.74975 | 235.89256 | 2.149367641 | 1.63E-06 |
| MAX       | 1106.0552 | 2376.5882 | 2.148706601 | 2.64E-32 |
| ZNF767    | 236.55296 | 508.06592 | 2.147789265 | 6.57E-15 |
| MIA3      | 3097.9304 | 6646.4744 | 2.145456313 | 1.61E-38 |
| LOC220594 | 71.663248 | 153.40767 | 2.140674285 | 2.32E-06 |
| ERLEC1    | 3324.8774 | 7105.1787 | 2.136974616 | 5.55E-41 |
| KIF1A     | 3608.4796 | 7710.1978 | 2.13668876  | 8.19E-21 |
| TRIM4     | 1010.2778 | 2158.0367 | 2.136082497 | 9.76E-31 |
| C20orf26  | 27.607406 | 58.897601 | 2.133398551 | 0.00257  |
| MZF1      | 117.77743 | 251.24004 | 2.133176347 | 3.11E-07 |
| C8orf73   | 94.492669 | 201.47208 | 2.132145119 | 7.69E-08 |
| SEC31B    | 120.28497 | 256.42716 | 2.131830393 | 3.85E-09 |
| MICALL1   | 1018.7231 | 2171.3182 | 2.131411549 | 1.33E-30 |
| GATAD1    | 2763.8533 | 5886.2862 | 2.12973898  | 2.28E-39 |
| ZSWIM4    | 123.65322 | 262.87862 | 2.12593428  | 1.95E-09 |
| SAR1B     | 2172.6519 | 4614.9517 | 2.124110057 | 1.53E-22 |
| GPC4      | 173.07337 | 367.48087 | 2.123266354 | 1.00E-11 |
| MIS12     | 1005.9301 | 2135.5611 | 2.122971566 | 3.73E-30 |
| ING4      | 511.60407 | 1085.5203 | 2.121797669 | 1.55E-22 |
| CHIC2     | 142.34096 | 301.58392 | 2.118743008 | 2.91E-10 |
| PUS1      | 231.07011 | 489.5287  | 2.118528886 | 2.66E-14 |
| TPD52L2   | 2191.2771 | 4639.4081 | 2.117216537 | 2.58E-37 |
| CCNK      | 1154.3026 | 2443.7536 | 2.117082297 | 1.44E-31 |
| CDK13     | 2217.4623 | 4694.4438 | 2.117034306 | 2.43E-37 |
| BCL10     | 306.5071  | 648.84825 | 2.116911012 | 5.68E-17 |
| SFRP4     | 70.25979  | 148.51059 | 2.113735117 | 3.94E-06 |
| TARS      | 3013.2183 | 6368.828  | 2.113629834 | 2.66E-33 |
| PGAM2     | 172.25624 | 363.98517 | 2.113044963 | 1.12E-11 |

|           |           |           |             |          |
|-----------|-----------|-----------|-------------|----------|
| NRBF2     | 602.1546  | 1272.1804 | 2.112713836 | 3.25E-24 |
| YIPF4     | 742.39352 | 1568.3477 | 2.112555734 | 1.35E-26 |
| ZNF263    | 653.88262 | 1380.6043 | 2.111394748 | 4.26E-25 |
| RCN1      | 1228.8852 | 2592.9166 | 2.109974701 | 8.51E-32 |
| CTH       | 316.18777 | 667.02309 | 2.109579062 | 5.35E-17 |
| DNTTIP1   | 910.0963  | 1919.0392 | 2.108611121 | 9.96E-29 |
| GPT2      | 1789.5287 | 3772.2537 | 2.107959281 | 2.08E-35 |
| ZNF814    | 249.58945 | 526.04728 | 2.107650318 | 1.10E-14 |
| DIS3      | 1892.6607 | 3988.5265 | 2.107364779 | 1.80E-35 |
| ZNF555    | 345.12379 | 726.7382  | 2.105731996 | 8.08E-18 |
| SNHG8     | 253.56273 | 533.7835  | 2.105133885 | 7.35E-15 |
| LOC155060 | 104.87821 | 220.6939  | 2.104287516 | 4.61E-08 |
| GLTSCR2   | 549.37235 | 1155.8146 | 2.103881955 | 2.84E-14 |
| TPRG1L    | 366.08812 | 769.9256  | 2.103115474 | 7.45E-18 |
| GPR173    | 345.11751 | 725.77567 | 2.102981331 | 7.66E-18 |
| TRIM39    | 155.33374 | 326.1981  | 2.099982231 | 1.09E-10 |
| CCDC149   | 378.53214 | 794.8499  | 2.099821444 | 9.72E-19 |
| GADD45A   | 994.38439 | 2087.9798 | 2.099771344 | 3.33E-29 |
| C14orf79  | 208.8083  | 438.41162 | 2.099589024 | 4.84E-13 |
| TBL2      | 2672.7537 | 5610.8622 | 2.099281458 | 5.79E-38 |
| KIAA1147  | 1366.473  | 2868.0824 | 2.098894322 | 2.39E-32 |
| GGT1      | 29.160553 | 61.197145 | 2.098627726 | 0.002702 |
| ENDOV     | 318.68274 | 668.12233 | 2.096512412 | 4.97E-17 |
| COG6      | 1518.5946 | 3181.172  | 2.094813208 | 4.55E-33 |
| SH3BGR    | 207.88518 | 434.9886  | 2.092446449 | 1.03E-12 |
| FBXO8     | 532.96147 | 1114.8222 | 2.091750092 | 1.97E-20 |
| METTL21D  | 128.60589 | 268.92756 | 2.091098348 | 1.05E-06 |
| ABTB1     | 125.79269 | 262.75783 | 2.088816366 | 4.18E-09 |
| FADS3     | 609.32158 | 1270.3318 | 2.084829807 | 1.66E-23 |
| COPB1     | 5339.8753 | 11115.303 | 2.081566028 | 1.78E-40 |
| SLC7A1    | 4212.9799 | 8765.0557 | 2.080488383 | 1.19E-39 |
| EFCAB6    | 44.623453 | 92.685735 | 2.07706324  | 0.000309 |
| ACAD11    | 124.88828 | 258.89976 | 2.073050894 | 7.55E-09 |
| ELL3      | 106.31909 | 220.25088 | 2.071602463 | 7.73E-08 |
| ZNF70     | 221.46428 | 458.66034 | 2.071035238 | 4.89E-13 |
| ZNF829    | 205.44005 | 425.40383 | 2.070695661 | 2.42E-12 |
| COBL      | 115.5257  | 239.19478 | 2.070489746 | 2.54E-08 |
| ZNF529    | 546.29733 | 1131.0678 | 2.070425335 | 9.46E-22 |
| TMEM47    | 1713.6678 | 3547.0982 | 2.06988666  | 4.04E-33 |
| PGD       | 4196.0764 | 8680.3198 | 2.068675349 | 5.82E-39 |
| THUMPD1   | 1021.8358 | 2112.9927 | 2.067839758 | 2.79E-28 |
| LARP1B    | 587.35915 | 1214.1165 | 2.06707691  | 2.17E-22 |
| RSL24D1   | 1429.7407 | 2946.8664 | 2.061119378 | 1.04E-17 |
| C2orf18   | 1580.2962 | 3256.2786 | 2.060549445 | 2.70E-32 |
| NOC4L     | 248.34183 | 511.34391 | 2.059032536 | 1.96E-05 |
| MON2      | 2026.8864 | 4173.2171 | 2.058929937 | 5.55E-34 |
| WDR52     | 156.60623 | 322.35215 | 2.058361006 | 3.89E-10 |

|              |           |           |             |          |
|--------------|-----------|-----------|-------------|----------|
| CTAGE5       | 417.31722 | 858.43519 | 2.057032729 | 1.16E-18 |
| PRRC1        | 2057.7811 | 4231.8088 | 2.056491243 | 6.34E-34 |
| MYSM1        | 986.58751 | 2024.9224 | 2.052450835 | 2.80E-15 |
| ANKHD1       | 129.1298  | 264.6064  | 2.049150571 | 1.48E-08 |
| LOC388796    | 232.13677 | 475.67122 | 2.049098981 | 5.91E-13 |
| GAB2         | 991.88313 | 2032.1792 | 2.04880914  | 3.16E-27 |
| NFX1         | 1696.3274 | 3473.014  | 2.047372463 | 4.46E-32 |
| BNIP1        | 187.4946  | 383.79503 | 2.046965729 | 3.81E-11 |
| TMEM50B      | 1685.131  | 3447.8402 | 2.046036866 | 6.43E-32 |
| TRIB1        | 252.67703 | 516.86122 | 2.045540976 | 1.12E-13 |
| TSN          | 3499.972  | 7158.2772 | 2.045238435 | 1.05E-36 |
| ABCC1        | 442.37967 | 903.70477 | 2.04282619  | 5.89E-19 |
| ZCCHC8       | 492.31758 | 1005.2907 | 2.041955699 | 7.53E-20 |
| SGMS2        | 268.02139 | 546.94046 | 2.040659772 | 5.47E-11 |
| KLHDC10      | 5194.1098 | 10597.494 | 2.0402908   | 2.02E-38 |
| MTO1         | 343.83259 | 701.43941 | 2.040060839 | 2.74E-16 |
| PTHLH        | 49.22676  | 100.42195 | 2.039986968 | 0.000224 |
| CLIP4        | 573.07517 | 1168.6777 | 2.039309596 | 2.47E-21 |
| CSAD         | 172.58688 | 351.83123 | 2.038574561 | 1.15E-06 |
| HSD17B7      | 262.1893  | 534.44007 | 2.038374804 | 6.94E-10 |
| C7orf23      | 121.38278 | 247.4062  | 2.038231498 | 2.98E-08 |
| LOC100506548 | 683.44238 | 1392.553  | 2.03755731  | 3.68E-23 |
| YIF1A        | 814.01293 | 1656.9819 | 2.035571923 | 1.80E-14 |
| INSIG2       | 868.81623 | 1768.2495 | 2.035239911 | 2.12E-25 |
| KRT10        | 639.59249 | 1301.4943 | 2.034880583 | 2.00E-16 |
| RNF113A      | 241.56791 | 490.40262 | 2.030081801 | 4.86E-13 |
| KIAA1370     | 468.38408 | 950.56127 | 2.029448299 | 5.69E-19 |
| GRPEL2       | 628.07788 | 1273.8195 | 2.028123517 | 6.05E-22 |
| MON1B        | 901.03309 | 1826.7522 | 2.027397407 | 1.03E-25 |
| GOLGA8B      | 267.89041 | 543.0059  | 2.026970296 | 4.37E-10 |
| BSDC1        | 1313.5662 | 2662.3252 | 2.026791797 | 4.55E-29 |
| MTHFR        | 759.67767 | 1536.7989 | 2.022961754 | 8.52E-24 |
| YKT6         | 7313.1872 | 14791.21  | 2.022539487 | 1.13E-38 |
| POLR3D       | 829.13916 | 1673.7432 | 2.018651726 | 1.62E-24 |
| SIKE1        | 1850.5446 | 3734.5601 | 2.018087027 | 3.15E-25 |
| EIF4B        | 2369.5775 | 4775.5955 | 2.015378466 | 3.36E-33 |
| PLA2G6       | 201.12356 | 405.19941 | 2.014678941 | 1.84E-05 |
| UBFD1        | 2725.3302 | 5486.7284 | 2.013234337 | 6.71E-34 |
| CD44         | 9874.9686 | 19865.148 | 2.011666916 | 7.25E-39 |
| LAMB2P1      | 38.710244 | 77.853608 | 2.01118876  | 0.001403 |
| C3orf62      | 199.22119 | 400.6287  | 2.010974369 | 4.70E-09 |
| WDR48        | 1171.5807 | 2353.2182 | 2.008583935 | 1.87E-27 |
| FLJ45340     | 386.69708 | 776.51412 | 2.008068214 | 9.94E-17 |
| SDHAP1       | 67.590131 | 135.62359 | 2.006559019 | 3.36E-05 |
| AKAP9        | 3073.8471 | 6162.4547 | 2.004801957 | 4.25E-34 |
| GIGYF1       | 1064.9684 | 2134.2279 | 2.004029268 | 1.85E-26 |
| CDC26        | 70.241079 | 140.69788 | 2.0030712   | 2.75E-05 |

|          |           |           |             |          |
|----------|-----------|-----------|-------------|----------|
| CTDP1    | 336.62191 | 674.07851 | 2.002479583 | 2.59E-08 |
| SNIP1    | 340.42693 | 681.60948 | 2.002219654 | 2.34E-15 |
| KDELR2   | 12709.412 | 25429.55  | 2.000843831 | 1.12E-38 |
| RAP1GAP2 | 153.79931 | 307.65293 | 2.000353113 | 2.94E-09 |
| GALNTL1  | 171.988   | 85.976424 | 0.499897806 | 3.87E-06 |
| C12orf75 | 341.6557  | 170.76881 | 0.499827195 | 7.23E-10 |
| SLC19A1  | 442.36711 | 221.04416 | 0.499684895 | 0.001159 |
| CPNE2    | 9263.7192 | 4628.8487 | 0.499674973 | 6.21E-36 |
| SNRK     | 3176.692  | 1586.7641 | 0.499502037 | 9.27E-30 |
| ZNF788   | 523.19968 | 261.22353 | 0.499280761 | 3.08E-13 |
| FAM72D   | 66.716863 | 33.300813 | 0.499136375 | 0.002922 |
| CDCA3    | 967.50043 | 482.85573 | 0.49907547  | 9.88E-19 |
| RPL22L1  | 745.61835 | 372.09207 | 0.499038236 | 3.55E-11 |
| MCM3     | 3468.4285 | 1730.6798 | 0.498980957 | 1.43E-30 |
| PCYOX1L  | 1035.7331 | 516.79685 | 0.498967178 | 1.87E-19 |
| MTPP     | 474.71521 | 236.81874 | 0.498864872 | 1.99E-12 |
| ENDOD1   | 10123.436 | 5041.966  | 0.498048902 | 8.03E-37 |
| ARHGAP29 | 2589.4451 | 1289.2878 | 0.497901195 | 3.12E-28 |
| GMNN     | 841.06542 | 418.66233 | 0.497776178 | 2.66E-11 |
| RAD51AP1 | 1314.7577 | 653.93466 | 0.497380372 | 9.22E-12 |
| NCAPG2   | 4118.0011 | 2047.6838 | 0.497251888 | 4.14E-28 |
| ABHD11   | 897.83325 | 446.28073 | 0.497064167 | 4.50E-18 |
| CTSL2    | 443.04712 | 220.20658 | 0.497027454 | 6.35E-12 |
| SYTL5    | 295.99058 | 147.08497 | 0.496924477 | 3.88E-09 |
| PBK      | 4890.0355 | 2429.7231 | 0.49687227  | 3.31E-23 |
| HSPA8    | 40474.387 | 20090.308 | 0.496370908 | 2.52E-40 |
| HAUS4    | 808.48663 | 401.28907 | 0.496345961 | 2.68E-17 |
| COL23A1  | 3859.934  | 1915.8373 | 0.496339398 | 4.33E-08 |
| GJA1     | 5658.5892 | 2805.0004 | 0.495706664 | 2.03E-34 |
| C3orf70  | 1213.2663 | 601.25489 | 0.49556713  | 3.84E-21 |
| ELOVL2   | 3197.2946 | 1584.0738 | 0.495441923 | 2.44E-30 |
| PDE3B    | 311.24138 | 153.95937 | 0.494662273 | 1.59E-09 |
| DCC      | 88.959961 | 43.944683 | 0.493982712 | 0.000507 |
| GATSL3   | 219.32482 | 108.29107 | 0.493747443 | 1.70E-07 |
| RBL1     | 1399.1392 | 690.22758 | 0.493323027 | 6.44E-23 |
| GPR155   | 2881.2566 | 1420.6909 | 0.493080333 | 6.24E-30 |
| CAMK2A   | 168.29539 | 82.903675 | 0.492608126 | 3.19E-06 |
| C5orf39  | 106.01343 | 52.156103 | 0.491976374 | 0.000161 |
| ANKRD32  | 484.20249 | 238.12357 | 0.491785104 | 5.37E-13 |
| POLR3G   | 167.9773  | 82.605675 | 0.491766902 | 2.71E-06 |
| CHST11   | 13849.063 | 6804.6978 | 0.491347151 | 3.51E-39 |
| THSD1    | 660.55683 | 324.47448 | 0.491213577 | 9.81E-16 |
| NCAPH    | 1718.4271 | 843.47812 | 0.49084312  | 2.55E-18 |
| ASRGL1   | 729.36318 | 357.9082  | 0.490713286 | 1.15E-16 |
| IDH2     | 3963.2656 | 1944.3902 | 0.490603056 | 1.15E-32 |
| CHSY3    | 73.422216 | 35.98696  | 0.490137208 | 0.001377 |
| GIN3     | 624.36028 | 305.80852 | 0.489794958 | 2.30E-15 |

|          |           |           |             |          |
|----------|-----------|-----------|-------------|----------|
| RFC3     | 1468.557  | 718.06369 | 0.488958684 | 1.89E-15 |
| ACCN2    | 668.77163 | 326.84256 | 0.488720729 | 3.78E-16 |
| IFITM2   | 290.30191 | 141.76909 | 0.488350523 | 2.42E-09 |
| GPER     | 191.655   | 93.591846 | 0.48833502  | 1.42E-05 |
| PODXL    | 75143.468 | 36679.323 | 0.488123899 | 1.38E-42 |
| KDR      | 336.52221 | 164.14811 | 0.48777793  | 2.86E-10 |
| TMEM2    | 2625.81   | 1280.0737 | 0.487496692 | 5.43E-30 |
| SORL1    | 11116.653 | 5417.7953 | 0.487358518 | 2.91E-39 |
| TMEM177  | 220.78441 | 107.56216 | 0.487181882 | 8.87E-08 |
| ANP32D   | 78.749102 | 38.362994 | 0.487154677 | 0.000857 |
| NCAPG    | 2726.6464 | 1327.3611 | 0.48681087  | 4.94E-21 |
| ST3GAL4  | 1311.0149 | 637.72121 | 0.486433216 | 4.28E-23 |
| HIP1     | 16718.355 | 8130.8783 | 0.486344399 | 1.27E-40 |
| NELL2    | 408.99631 | 198.91088 | 0.486339059 | 5.44E-12 |
| S100B    | 10327.435 | 5016.7115 | 0.485765504 | 2.37E-39 |
| FAM81A   | 695.91754 | 337.8488  | 0.485472464 | 9.91E-17 |
| CLN6     | 1555.3649 | 753.93366 | 0.484731048 | 5.04E-25 |
| KCNA2    | 1241.5786 | 601.79067 | 0.484698018 | 9.03E-23 |
| S1PR5    | 136.61486 | 66.170721 | 0.484359608 | 1.44E-05 |
| FKBP5    | 2072.7201 | 1003.7723 | 0.484277796 | 8.38E-28 |
| ARHGAP20 | 908.27505 | 439.82928 | 0.48424679  | 1.93E-12 |
| IKBKE    | 225.42514 | 108.98778 | 0.483476623 | 5.42E-08 |
| CENPW    | 325.57534 | 157.38653 | 0.48341049  | 8.86E-06 |
| C11orf82 | 1013.621  | 489.97172 | 0.483387485 | 1.13E-20 |
| TNS3     | 5067.6242 | 2449.2225 | 0.483307834 | 8.23E-36 |
| SERPINI1 | 1502.3021 | 725.64277 | 0.483020529 | 6.77E-22 |
| KIF4A    | 2658.8316 | 1283.0014 | 0.482543323 | 8.09E-31 |
| PTK2B    | 1597.8238 | 770.7431  | 0.482370533 | 1.76E-25 |
| SHF      | 598.92348 | 288.31032 | 0.481380887 | 2.19E-15 |
| GDF11    | 1455.5141 | 700.37617 | 0.481188176 | 8.70E-25 |
| XRCC3    | 780.24907 | 375.37802 | 0.481100245 | 1.23E-07 |
| ADAMTS4  | 162.65041 | 78.228097 | 0.480958495 | 2.48E-06 |
| FGD4     | 1419.1742 | 682.0082  | 0.48056692  | 1.04E-24 |
| XKR5     | 89.053516 | 42.760646 | 0.480167969 | 0.00174  |
| TUBA1B   | 39168.28  | 18806.013 | 0.480133755 | 8.78E-44 |
| ANLN     | 7500.1706 | 3600.3175 | 0.480031417 | 4.95E-39 |
| HAUS1    | 841.84513 | 404.00741 | 0.479907046 | 4.18E-09 |
| NETO2    | 2792.2342 | 1339.3257 | 0.479660957 | 8.68E-32 |
| IQCD     | 65.76875  | 31.532892 | 0.479450982 | 0.001788 |
| SCARA3   | 5204.6382 | 2494.7174 | 0.479325794 | 8.78E-35 |
| CKLF     | 189.57794 | 90.639888 | 0.478114109 | 3.65E-07 |
| ZNF30    | 187.70043 | 89.733776 | 0.478069115 | 4.07E-07 |
| CDK2     | 3024.5518 | 1445.2366 | 0.477834966 | 1.05E-32 |
| CENPI    | 457.34365 | 218.53142 | 0.477827594 | 0.000318 |
| CFI      | 2849.2704 | 1361.2901 | 0.477767962 | 2.23E-32 |
| TMCO7    | 1000.7404 | 478.09951 | 0.477745797 | 6.26E-21 |
| CDH24    | 660.82494 | 315.52205 | 0.477466919 | 1.13E-16 |

|            |           |           |             |          |
|------------|-----------|-----------|-------------|----------|
| RRM1       | 5951.6668 | 2840.7174 | 0.477297777 | 3.97E-38 |
| CTPS       | 1634.981  | 780.07419 | 0.477115138 | 1.43E-26 |
| CLMP       | 128.46863 | 61.152843 | 0.476013818 | 1.67E-05 |
| CCDC34     | 1247.2423 | 593.56714 | 0.475903647 | 9.12E-24 |
| MCM2       | 4514.946  | 2146.0516 | 0.475321663 | 2.20E-36 |
| TMEM178    | 1587.7502 | 753.06389 | 0.474296212 | 1.23E-26 |
| ST8SIA5    | 1846.4277 | 874.90233 | 0.473835145 | 2.97E-28 |
| CCDC80     | 10775.204 | 5102.7319 | 0.473562461 | 5.29E-42 |
| TEK        | 363.55572 | 171.97292 | 0.473030439 | 1.73E-11 |
| TCF19      | 2073.2501 | 980.6765  | 0.473014078 | 8.95E-30 |
| SPAG5      | 3969.0359 | 1876.9995 | 0.472910677 | 5.45E-25 |
| ADA        | 144.89835 | 68.458151 | 0.472456377 | 4.62E-06 |
| GIN51      | 1850.9626 | 874.08482 | 0.472232579 | 1.36E-28 |
| MEF2C      | 448.96661 | 211.97509 | 0.472139984 | 2.70E-07 |
| MGAT5B     | 1156.941  | 545.75227 | 0.471720059 | 2.49E-06 |
| CCNF       | 1253.7854 | 590.50235 | 0.470975629 | 3.44E-24 |
| ILDR2      | 2753.3554 | 1296.6578 | 0.470937325 | 3.52E-33 |
| CHAF1A     | 1439.1155 | 677.28832 | 0.470628187 | 6.07E-26 |
| BEST3      | 631.62081 | 297.0897  | 0.470360849 | 5.24E-17 |
| TRAF4      | 5577.3387 | 2622.5123 | 0.470208548 | 4.35E-39 |
| CDCA2      | 1512.7749 | 711.07645 | 0.470047747 | 9.91E-27 |
| PDGFD      | 405.44095 | 190.37723 | 0.469556004 | 1.77E-10 |
| GSS        | 2618.855  | 1229.3834 | 0.469435443 | 1.29E-32 |
| LRRC4      | 167.06661 | 78.361003 | 0.469040486 | 8.63E-07 |
| MAP2K6     | 305.67753 | 143.33973 | 0.468924643 | 7.00E-07 |
| HEPACAM    | 863.18356 | 404.74843 | 0.46890192  | 6.00E-11 |
| GSTT1      | 864.02568 | 405.09073 | 0.468841073 | 2.72E-20 |
| MMS22L     | 597.86938 | 280.26399 | 0.46877127  | 2.71E-16 |
| CDKN2C     | 6304.7741 | 2955.0774 | 0.468704728 | 3.86E-40 |
| SKA3       | 959.82211 | 449.28115 | 0.468087937 | 8.77E-22 |
| COCH       | 78.730391 | 36.84877  | 0.468037424 | 0.000486 |
| SMTN       | 409.60749 | 191.56923 | 0.467689759 | 7.31E-05 |
| ZNF367     | 866.61435 | 405.05854 | 0.467403455 | 1.44E-20 |
| TBC1D1     | 1396.8686 | 652.49692 | 0.46711403  | 5.08E-26 |
| MKI67      | 11864.08  | 5539.1506 | 0.466884134 | 5.68E-44 |
| C3orf58    | 3120.504  | 1455.5987 | 0.466462699 | 4.33E-35 |
| TEAD2      | 982.77622 | 458.31804 | 0.466350351 | 5.61E-22 |
| CEP72      | 498.12467 | 232.26396 | 0.466276756 | 1.14E-14 |
| FAM198B    | 273.23601 | 127.24707 | 0.465703903 | 6.10E-10 |
| WSCD1      | 16162.109 | 7503.4061 | 0.464259107 | 1.98E-45 |
| RAD51      | 658.87271 | 305.7078  | 0.463986131 | 8.35E-18 |
| FAM149A    | 123.01077 | 57.041076 | 0.463707997 | 1.50E-05 |
| RPP25      | 56.23777  | 26.071994 | 0.463602923 | 0.003294 |
| BK250D10.8 | 224.96979 | 104.28002 | 0.463528982 | 1.09E-08 |
| SIPA1      | 522.08303 | 241.86881 | 0.463276514 | 6.03E-07 |
| EMILIN3    | 103.62444 | 48.000034 | 0.463211529 | 6.96E-05 |
| C1orf135   | 142.32225 | 65.872722 | 0.46284205  | 2.80E-06 |

|              |           |           |             |          |
|--------------|-----------|-----------|-------------|----------|
| SCN4B        | 950.65291 | 439.95007 | 0.46278727  | 4.58E-22 |
| AIF1L        | 42160.571 | 19507.272 | 0.462689924 | 3.71E-48 |
| ITGA11       | 308.2785  | 142.19999 | 0.461271202 | 8.92E-08 |
| ANKRD45      | 582.63729 | 268.60533 | 0.461016371 | 1.04E-16 |
| RAD54L       | 555.14215 | 255.80694 | 0.460795375 | 3.14E-16 |
| SDC1         | 2129.9991 | 980.66819 | 0.460407792 | 4.59E-13 |
| PDK4         | 300.69372 | 138.36615 | 0.46015643  | 1.77E-07 |
| CDCA7        | 2141.5514 | 983.16536 | 0.459090246 | 2.36E-32 |
| FAM123A      | 58.608052 | 26.813012 | 0.457497079 | 0.002016 |
| PCDH12       | 127.37083 | 58.245187 | 0.457288276 | 8.61E-06 |
| CHRNA5       | 197.79902 | 90.341889 | 0.456735781 | 4.71E-08 |
| ID1          | 1867.791  | 851.07346 | 0.455657767 | 1.95E-05 |
| SH2B3        | 3349.6094 | 1526.0501 | 0.455590476 | 1.48E-37 |
| PREX1        | 14182.958 | 6459.9701 | 0.455474113 | 7.98E-29 |
| NLGN3        | 5208.1814 | 2371.6225 | 0.45536481  | 1.49E-41 |
| MCM8         | 2243.2672 | 1020.1228 | 0.454748688 | 1.58E-33 |
| TBX2         | 1394.3048 | 633.7382  | 0.454519124 | 5.23E-09 |
| CDC7         | 1690.6823 | 766.41814 | 0.453318839 | 2.17E-30 |
| CX3CL1       | 550.3766  | 249.47212 | 0.453275296 | 6.97E-13 |
| ABCG2        | 169.05639 | 76.625269 | 0.45325273  | 3.09E-07 |
| RNASEH2A     | 1285.4597 | 580.92172 | 0.45191748  | 6.31E-27 |
| SEMA3A       | 1325.4425 | 597.23588 | 0.450593598 | 1.54E-27 |
| C12orf34     | 203.78079 | 91.811811 | 0.450542029 | 1.48E-05 |
| FAM181B      | 1550.019  | 695.89787 | 0.44896085  | 1.18E-10 |
| NOS2         | 5348.0834 | 2399.9619 | 0.44875177  | 3.48E-43 |
| RAB34        | 3811.9178 | 1710.5477 | 0.448736761 | 3.96E-40 |
| STEAP1B      | 83.583222 | 37.501184 | 0.448668802 | 0.001002 |
| SPC24        | 364.21689 | 163.38701 | 0.448598126 | 6.96E-13 |
| PDGFA        | 9293.8218 | 4164.0349 | 0.448043332 | 4.40E-47 |
| CALB1        | 3236.2855 | 1449.3968 | 0.447858139 | 7.72E-39 |
| MLF1IP       | 1550.113  | 694.19052 | 0.447832204 | 6.04E-16 |
| ATAD2        | 5670.0601 | 2538.2073 | 0.447650857 | 4.82E-44 |
| ADORA1       | 743.88425 | 332.88734 | 0.447498842 | 1.12E-20 |
| SKP2         | 2601.3089 | 1162.8787 | 0.44703597  | 1.14E-36 |
| PIP5K1B      | 51.085563 | 22.834151 | 0.446978553 | 0.003134 |
| DGKB         | 148.91534 | 66.513022 | 0.446649913 | 8.05E-07 |
| LOC647946    | 197.51835 | 88.219552 | 0.446639776 | 2.26E-08 |
| SLC6A11      | 878.59045 | 391.68422 | 0.445809786 | 7.93E-23 |
| MCART6       | 136.00983 | 60.633334 | 0.44580112  | 2.10E-06 |
| SEZ6         | 2645.5702 | 1179.2811 | 0.445756864 | 1.81E-16 |
| CENPP        | 195.79681 | 87.257025 | 0.445650911 | 9.49E-05 |
| CD82         | 536.9846  | 239.04976 | 0.445170596 | 7.33E-17 |
| CPM          | 432.66786 | 192.57606 | 0.445089822 | 9.02E-15 |
| PSD          | 128.23782 | 56.996774 | 0.444461512 | 4.14E-06 |
| MECOM        | 431.37667 | 191.43632 | 0.443779972 | 1.04E-14 |
| LOC100128191 | 379.09975 | 168.22768 | 0.443755729 | 1.47E-13 |
| KIF21B       | 549.97124 | 243.91465 | 0.443504385 | 2.01E-17 |



|           |           |           |             |          |
|-----------|-----------|-----------|-------------|----------|
| HYAL2     | 1467.7521 | 650.88994 | 0.443460393 | 1.49E-29 |
| LOC728819 | 118.35133 | 52.4098   | 0.442832385 | 8.31E-06 |
| GDPD2     | 279.47973 | 123.67489 | 0.442518276 | 7.43E-11 |
| FAH       | 474.44069 | 209.2969  | 0.441144493 | 7.84E-16 |
| PRIM1     | 589.62331 | 259.99519 | 0.440951347 | 2.45E-18 |
| BRIP1     | 988.66457 | 435.16997 | 0.440159362 | 3.23E-15 |
| TIMELESS  | 4486.1849 | 1974.566  | 0.440143702 | 1.61E-43 |
| UBE2T     | 2063.3388 | 907.74005 | 0.439937475 | 7.09E-35 |
| POLA2     | 1241.329  | 546.0745  | 0.439911158 | 4.74E-28 |
| FLRT1     | 636.10544 | 279.34576 | 0.439150095 | 6.35E-05 |
| SPC25     | 924.36784 | 405.76737 | 0.438967424 | 2.33E-24 |
| ITPRIPL1  | 369.31924 | 161.96139 | 0.43854036  | 1.28E-13 |
| MNS1      | 545.29309 | 238.90889 | 0.438129322 | 8.08E-18 |
| CD226     | 53.131477 | 23.265056 | 0.437877079 | 0.002182 |
| GRIN2A    | 1581.8805 | 691.58882 | 0.437194091 | 1.41E-22 |
| MCM5      | 2383.7614 | 1041.6317 | 0.436969789 | 2.05E-11 |
| DCBLD1    | 290.97563 | 126.53824 | 0.434875741 | 1.46E-06 |
| MT3       | 5407.9268 | 2350.5729 | 0.434653246 | 7.84E-47 |
| PLEKHA6   | 926.4012  | 402.27168 | 0.434230524 | 1.16E-24 |
| TMEM35    | 247.64952 | 107.25205 | 0.433079979 | 2.03E-10 |
| SPON1     | 227.85155 | 98.641913 | 0.432921841 | 8.54E-10 |
| KIRREL2   | 404.19333 | 174.96918 | 0.43288488  | 5.37E-12 |
| CENPH     | 548.91714 | 237.38255 | 0.432456077 | 7.52E-17 |
| EPHB2     | 1894.1949 | 819.02902 | 0.432389003 | 1.09E-34 |
| OLFML3    | 98.946286 | 42.77276  | 0.432282619 | 2.49E-05 |
| SHD       | 71.831648 | 31.045571 | 0.432199068 | 0.000348 |
| FAM40B    | 1139.42   | 492.30761 | 0.432068601 | 6.72E-27 |
| CPNE5     | 1528.1442 | 659.64925 | 0.431666902 | 4.08E-32 |
| ZMAT4     | 732.80012 | 316.26306 | 0.43158162  | 6.57E-22 |
| MYBL2     | 4216.5165 | 1818.9796 | 0.43139392  | 1.08E-44 |
| FANCI     | 4837.8149 | 2084.9109 | 0.430961281 | 9.45E-19 |
| MCM4      | 11082.309 | 4774.4679 | 0.430818858 | 1.71E-52 |
| C15orf59  | 1096.6925 | 471.03994 | 0.42950958  | 5.14E-10 |
| LCTL      | 393.82036 | 169.10161 | 0.429387678 | 7.73E-15 |
| CORO1A    | 153.07573 | 65.639099 | 0.428801478 | 0.001128 |
| TYMS      | 1436.1963 | 615.63604 | 0.428657304 | 1.70E-31 |
| SHMT1     | 755.57969 | 323.64486 | 0.428339812 | 1.41E-22 |
| OAS3      | 4013.3285 | 1716.7212 | 0.427754969 | 5.60E-45 |
| C4orf19   | 907.22082 | 387.08929 | 0.426675933 | 1.61E-25 |
| LAMA2     | 954.7946  | 407.33386 | 0.426619357 | 5.15E-26 |
| ESCO2     | 1463.3923 | 623.70659 | 0.426206    | 1.40E-12 |
| ERCC6L    | 710.06426 | 302.30486 | 0.425742964 | 3.90E-22 |
| SLC35G1   | 84.244388 | 35.854054 | 0.425595758 | 7.01E-05 |
| LRR1      | 769.0778  | 326.95124 | 0.425121145 | 2.27E-20 |
| FAM59B    | 1443.2697 | 613.54589 | 0.425108263 | 4.70E-32 |
| DPF1      | 456.52024 | 193.90096 | 0.42473684  | 1.42E-16 |
| RGR       | 52.65742  | 22.358944 | 0.424611463 | 0.001605 |

|              |           |           |             |          |
|--------------|-----------|-----------|-------------|----------|
| TMEM106C     | 5415.2186 | 2298.7425 | 0.424496717 | 6.27E-49 |
| THY1         | 13811.537 | 5858.6228 | 0.424183253 | 2.52E-55 |
| FANCD2       | 2080.2238 | 882.1353  | 0.424057875 | 4.89E-32 |
| UNC5D        | 2538.5155 | 1075.416  | 0.42363974  | 1.49E-40 |
| A4GALT       | 132.03027 | 55.824851 | 0.422818585 | 9.57E-07 |
| POLE2        | 391.84929 | 165.50935 | 0.422380123 | 3.33E-15 |
| PSD4         | 195.3726  | 82.517072 | 0.422357437 | 3.85E-09 |
| TP73         | 317.24815 | 133.96434 | 0.422269906 | 6.01E-13 |
| CCR1         | 83.770332 | 35.334546 | 0.421802622 | 6.46E-05 |
| LOC100505666 | 63.192647 | 26.635805 | 0.42150165  | 0.000555 |
| ABCD2        | 618.97726 | 260.82482 | 0.42138029  | 1.13E-20 |
| MYH7         | 261.8088  | 109.88178 | 0.419702396 | 2.01E-11 |
| CTSC         | 1083.3693 | 453.78748 | 0.418866827 | 6.41E-29 |
| KLHDC8A      | 10942.85  | 4572.6493 | 0.417866413 | 7.06E-56 |
| DSCC1        | 847.4464  | 353.69987 | 0.417371377 | 1.18E-21 |
| SLC6A1       | 1845.9038 | 768.3913  | 0.416268339 | 2.82E-37 |
| CCDC74B      | 73.85885  | 30.614666 | 0.41450234  | 0.000155 |
| ZNF423       | 174.63895 | 72.360523 | 0.414343555 | 5.91E-05 |
| CDC25A       | 638.10163 | 264.34058 | 0.414260944 | 7.40E-22 |
| MASP1        | 188.81694 | 78.139493 | 0.413837309 | 3.95E-09 |
| HMGNS        | 60.672677 | 25.089393 | 0.413520459 | 0.000454 |
| VSNL1        | 847.36528 | 350.30489 | 0.413404826 | 6.24E-26 |
| MOXD1        | 84.019856 | 34.682131 | 0.412784943 | 0.002281 |
| DHFR         | 830.56133 | 342.61298 | 0.412507747 | 8.64E-26 |
| EYA2         | 1456.8927 | 599.49909 | 0.411491591 | 2.07E-34 |
| TAGLN3       | 303.75631 | 124.9676  | 0.411407429 | 4.29E-13 |
| CHAF1B       | 1216.0046 | 500.10819 | 0.411271617 | 9.36E-32 |
| FREM2        | 10298.292 | 4214.3787 | 0.40923086  | 1.65E-45 |
| FRAS1        | 2500.5347 | 1022.5189 | 0.408920106 | 1.35E-34 |
| GCNT2        | 191.26206 | 78.195909 | 0.40884171  | 1.61E-09 |
| LOC644936    | 70.97709  | 28.979651 | 0.408295841 | 0.000241 |
| RPS6KA1      | 236.32215 | 96.430973 | 0.408048809 | 4.56E-11 |
| NTRK1        | 71.850359 | 29.27765  | 0.407480915 | 0.000139 |
| CHDH         | 204.94729 | 83.435297 | 0.407106135 | 1.66E-08 |
| SLC25A10     | 220.92781 | 89.480079 | 0.405019527 | 1.08E-05 |
| KIAA1199     | 2036.511  | 823.85377 | 0.404541784 | 4.70E-41 |
| C1orf53      | 62.3568   | 25.210185 | 0.404289261 | 0.000368 |
| GPR123       | 816.81985 | 329.92327 | 0.403911913 | 3.62E-16 |
| ORC1         | 523.11855 | 211.05686 | 0.403458948 | 4.30E-20 |
| KCNJ16       | 4495.3168 | 1813.1162 | 0.403334463 | 2.50E-52 |
| NMB          | 677.98452 | 273.4017  | 0.403256552 | 1.19E-23 |
| AMACR        | 64.858059 | 26.071994 | 0.401985422 | 0.000279 |
| EPHA2        | 8044.4208 | 3223.175  | 0.400672105 | 4.83E-32 |
| SCN3A        | 345.65398 | 138.47483 | 0.400616912 | 3.49E-15 |
| CHRNA3       | 49.77566  | 19.938609 | 0.40056945  | 0.001208 |
| NEGR1        | 80.757594 | 32.261796 | 0.399489313 | 3.87E-05 |
| METTL7A      | 3670.5377 | 1462.6583 | 0.398486116 | 4.71E-51 |

|          |           |           |             |          |
|----------|-----------|-----------|-------------|----------|
| MEGF10   | 1555.4398 | 619.03102 | 0.397978139 | 7.39E-38 |
| CACNG8   | 1282.4594 | 510.28897 | 0.397898728 | 1.13E-34 |
| ADAMTS5  | 144.51785 | 57.439793 | 0.397458111 | 4.48E-08 |
| IGDCC3   | 463.86176 | 184.1632  | 0.397021739 | 1.37E-14 |
| VCAN     | 2235.3641 | 885.51401 | 0.396138608 | 3.72E-44 |
| RAMP1    | 1675.3563 | 663.63192 | 0.39611391  | 1.63E-05 |
| EPHB3    | 2936.4523 | 1161.2675 | 0.395466165 | 8.44E-40 |
| ZWINT    | 4774.6471 | 1885.3923 | 0.39487573  | 2.39E-29 |
| PCDH9    | 2204.4694 | 869.49785 | 0.394425001 | 3.38E-44 |
| CDC45    | 1103.2671 | 433.80457 | 0.393199932 | 8.81E-33 |
| SLC12A8  | 115.43214 | 45.281699 | 0.392279807 | 6.80E-07 |
| C16orf59 | 282.28665 | 110.6671  | 0.392038025 | 1.62E-13 |
| NRGN     | 129.2982  | 50.686181 | 0.392009962 | 4.75E-07 |
| SORD     | 336.6469  | 131.7091  | 0.391238121 | 2.87E-15 |
| SLC18A1  | 614.34281 | 239.82296 | 0.39037319  | 2.20E-23 |
| WDR76    | 1787.5328 | 696.83236 | 0.38982913  | 6.23E-42 |
| MAOB     | 215.89415 | 84.107785 | 0.389578799 | 4.12E-11 |
| GALNT12  | 289.68444 | 112.82162 | 0.389463874 | 2.75E-13 |
| SLC8A1   | 324.25916 | 125.88583 | 0.388225985 | 3.42E-15 |
| CHST7    | 1080.0195 | 418.31587 | 0.387322503 | 2.86E-10 |
| KIAA0101 | 2132.9562 | 823.81363 | 0.386230908 | 1.31E-13 |
| PIK3R3   | 3839.2884 | 1481.7188 | 0.385935797 | 1.03E-54 |
| IFI30    | 255.55251 | 98.376101 | 0.384954547 | 7.75E-13 |
| SLC38A3  | 757.78772 | 291.51597 | 0.384693448 | 2.22E-27 |
| FGFR2    | 833.83602 | 320.66072 | 0.384560881 | 4.79E-29 |
| RTTN     | 3883.3381 | 1490.4297 | 0.383801165 | 1.58E-55 |
| PCDH7    | 502.60943 | 192.56395 | 0.383128398 | 8.62E-18 |
| E2F1     | 1790.8199 | 685.94276 | 0.383032789 | 4.23E-43 |
| HELLS    | 559.67062 | 213.85169 | 0.382102756 | 6.85E-23 |
| TEX15    | 270.47894 | 103.18458 | 0.381488421 | 1.27E-13 |
| GIN52    | 1265.063  | 477.72502 | 0.377629432 | 1.37E-37 |
| EXO1     | 1231.6172 | 464.77365 | 0.377368583 | 2.97E-37 |
| C2orf80  | 208.75217 | 78.659002 | 0.376805678 | 2.16E-11 |
| E2F8     | 532.99889 | 200.5459  | 0.3762595   | 7.13E-23 |
| GSTT2    | 46.669367 | 17.550461 | 0.376059548 | 0.001162 |
| APOBEC3B | 242.72813 | 90.950001 | 0.374699059 | 5.38E-13 |
| CRISPLD1 | 3569.2523 | 1335.6127 | 0.374199572 | 5.42E-57 |
| GLT25D2  | 15785.885 | 5904.3717 | 0.374028547 | 3.60E-72 |
| ZBTB7C   | 371.59597 | 138.35404 | 0.372323835 | 4.68E-18 |
| TFAP2C   | 284.0519  | 105.35122 | 0.370887234 | 7.79E-15 |
| DTL      | 2600.7414 | 950.43632 | 0.365448217 | 1.08E-29 |
| ENHO     | 187.58816 | 68.33736  | 0.364294632 | 3.73E-11 |
| ASF1B    | 1424.9501 | 518.24669 | 0.363694634 | 1.29E-42 |
| RPH3A    | 3468.4535 | 1258.1214 | 0.362732685 | 1.26E-59 |
| MND1     | 383.14787 | 138.95004 | 0.362653808 | 4.57E-19 |
| NDP      | 628.29614 | 227.70121 | 0.362410649 | 6.47E-27 |
| SLC43A3  | 1305.6382 | 472.73137 | 0.362069195 | 4.74E-41 |

|              |           |           |             |          |
|--------------|-----------|-----------|-------------|----------|
| TK1          | 820.61858 | 296.81974 | 0.361702432 | 1.22E-31 |
| SEMA7A       | 164.16614 | 59.372807 | 0.361662941 | 5.10E-10 |
| PLA2G5       | 369.2444  | 132.71593 | 0.359425714 | 8.87E-19 |
| PPP1R1B      | 2392.0077 | 856.92096 | 0.358243394 | 4.91E-54 |
| CCNE2        | 1351.9709 | 480.42328 | 0.355350314 | 6.68E-22 |
| CSRNP3       | 384.51391 | 134.72959 | 0.350389381 | 2.78E-20 |
| ZNF467       | 49.850504 | 17.385368 | 0.348750085 | 0.000307 |
| B3GALT2      | 97.374429 | 33.864624 | 0.347777378 | 4.42E-07 |
| METTL7B      | 1401.6716 | 484.00343 | 0.345304445 | 9.16E-46 |
| AKAP5        | 301.41102 | 104.01421 | 0.345090916 | 3.00E-17 |
| FGL2         | 121.21438 | 41.689441 | 0.343931489 | 1.66E-08 |
| DIO2         | 37.026121 | 12.70979  | 0.343265508 | 0.001809 |
| GPR37L1      | 361.17916 | 123.81991 | 0.342821301 | 2.98E-09 |
| PPP1R1C      | 310.18728 | 105.73783 | 0.34088382  | 1.35E-14 |
| FLRT3        | 1343.9681 | 457.134   | 0.340137544 | 1.51E-39 |
| GRM3         | 42.084772 | 14.268316 | 0.3390375   | 0.00074  |
| MAB21L2      | 32.135868 | 10.853265 | 0.337730566 | 0.003227 |
| TLCD1        | 1259.2371 | 424.25613 | 0.336915218 | 3.61E-45 |
| CDH10        | 399.42791 | 133.67846 | 0.334674809 | 4.16E-22 |
| CENPM        | 571.70901 | 190.11142 | 0.332531796 | 3.73E-14 |
| CHAC2        | 218.51396 | 72.658522 | 0.332512037 | 3.72E-14 |
| BTBD17       | 127.4581  | 42.265365 | 0.331602026 | 0.001298 |
| PKDCC        | 1721.2152 | 569.80264 | 0.331046725 | 1.03E-53 |
| POU3F1       | 96.064526 | 31.742287 | 0.33042673  | 2.23E-07 |
| E2F2         | 486.9657  | 159.99204 | 0.328548883 | 7.19E-26 |
| LOC100507341 | 33.670304 | 10.986171 | 0.326286651 | 0.001819 |
| FAM111B      | 978.77808 | 317.80948 | 0.324700238 | 3.22E-36 |
| FST          | 698.71817 | 225.23657 | 0.322356826 | 2.82E-34 |
| C3orf36      | 69.823156 | 22.226039 | 0.318319022 | 5.52E-06 |
| MCM10        | 2720.4711 | 864.28269 | 0.317695964 | 1.80E-68 |
| SLC7A8       | 498.00612 | 157.28582 | 0.315831088 | 7.48E-28 |
| C1orf106     | 112.73749 | 35.113036 | 0.311458371 | 8.03E-07 |
| CCNE1        | 380.02915 | 118.23822 | 0.311129345 | 1.78E-23 |
| CLSPN        | 1254.7086 | 387.53611 | 0.30886543  | 1.00E-50 |
| PTCHD2       | 553.2895  | 169.9513  | 0.307165243 | 3.80E-11 |
| MPPED1       | 75.168753 | 23.05566  | 0.306718676 | 1.01E-06 |
| RRM2         | 6721.9859 | 2023.7664 | 0.30106674  | 1.48E-93 |
| RIBC2        | 76.509798 | 22.834151 | 0.298447411 | 1.12E-06 |
| RANBP3L      | 891.10303 | 258.32799 | 0.289896882 | 1.02E-43 |
| MRAP2        | 51.634464 | 14.876428 | 0.288110445 | 2.81E-05 |
| SLCO2A1      | 2474.1999 | 708.36608 | 0.286301068 | 1.54E-76 |
| UHRF1        | 1369.3858 | 382.25658 | 0.279144553 | 9.07E-15 |
| FAM5C        | 109.00746 | 30.228063 | 0.277302712 | 7.36E-10 |
| NXPH2        | 49.869215 | 13.49511  | 0.270610033 | 8.38E-05 |
| MYB          | 37.288075 | 9.3833429 | 0.251644605 | 0.000206 |
| TNFRSF11A    | 22.074698 | 5.4487835 | 0.246833879 | 0.003319 |
| SLC26A9      | 28.062752 | 6.4878007 | 0.231189042 | 0.000536 |

|         |           |           |             |          |
|---------|-----------|-----------|-------------|----------|
| SLITRK1 | 352.54644 | 79.875227 | 0.226566539 | 3.81E-31 |
| GIMAP2  | 24.61338  | 5.4487835 | 0.221374858 | 0.001044 |
| LGR6    | 69.879289 | 14.268316 | 0.204185191 | 8.06E-09 |
| SLC24A4 | 20.521552 | 3.9788614 | 0.193886962 | 0.001548 |
| CACNA1E | 17.583659 | 2.4203355 | 0.137646869 | 0.001177 |
